# Circadian disruption enhances HSF1 signaling and tumorigenesis in Kras-driven lung cancer

Marie Pariollaud<sup>1</sup>, Lara H. Ibrahim<sup>1,2</sup>, Emanuel Irizarry<sup>1</sup>, Rebecca M. Mello<sup>1</sup>, Alanna B. Chan<sup>1</sup>, Brian J. Altman<sup>3</sup>, Reuben J. Shaw<sup>4</sup>, Michael J. Bollong<sup>2</sup>, R. Luke Wiseman<sup>1</sup>, Katja A. Lamia<sup>1,\*</sup>

1 Department of Molecular Medicine, Scripps Research Institute, La Jolla, CA, 92037, USA.

2 Department of Chemistry, Scripps Research Institute, La Jolla, CA, 92037, USA.

3 Department of Biomedical Genetics and Wilmot Cancer Institute, University of Rochester Medical Center, Rochester, NY, 14642, USA.

4 Molecular and Cell Biology Laboratory, Salk Institute for Biological Studies, La Jolla, CA, 92037, USA.

\* correspondence to: [klamia@scripps.edu](mailto:klamia@scripps.edu)

## Abstract

Disrupted circadian rhythmicity is a prominent feature of modern society and has been designated as a probable carcinogen by the World Health Organization. However, the biological mechanisms that connect circadian disruption and cancer risk remain largely undefined. We demonstrate that exposure to chronic circadian disruption (chronic jetlag, CJL) increases tumor burden in a mouse model of KRAS-driven lung cancer. Molecular characterization of tumors and tumor-bearing lung tissues revealed that CJL enhances the expression of heat shock factor 1 (HSF1) target genes. Consistently, exposure to CJL disrupted the highly rhythmic nuclear trafficking of HSF1 in the lung, resulting in an enhanced accumulation of HSF1 in the nucleus. HSF1 has been shown to promote tumorigenesis in other systems, and we find that pharmacological inhibition of HSF1 reduces the growth of KRAS-mutant human lung cancer cells. These findings implicate HSF1 as a molecular link between circadian disruption and enhanced tumorigenesis.

## 28 MAIN TEXT

### 29 30 Introduction

31 In 2015, the National Health Interview Survey revealed that 12–35% of the workforce in  
32 various United States industries work irregular schedules, including night and rotating shifts (1).  
33 Several human and animal studies have demonstrated that disruption of circadian rhythms, either  
34 by genetic or environmental means, enhances cancer risk (2), including the risk of lung  
35 adenocarcinoma (3-7). Lung cancer is the leading cause of cancer deaths in men and women  
36 worldwide (8, 9). The lung adenocarcinoma (LUAD) subtype of non-small cell lung cancer  
37 (NSCLC) is the most prevalent form of lung cancer and Kirsten rat sarcoma (KRAS) is the most  
38 frequently mutated oncogene in human LUAD (10). Despite extensive characterization of genetic  
39 events that contribute to lung cancer, there has been relatively little research addressing the  
40 impact of environmental circadian disruption on lung tumorigenesis in humans. The lung is under  
41 tight circadian control, as evidenced by robust 24-hour rhythms in intrinsic defense mechanisms  
42 and lung physiology indices such as lung resistance and peak expiratory flow (11). Selective  
43 ablation of bronchiolar epithelial cells results in the loss of circadian clock oscillations in mouse  
44 lung slices, demonstrating that airway epithelial cells are key circadian oscillators within the lung  
45 (12). NSCLC is a cancer of epithelial origin (13, 14), so this reinforces the hypothesis that  
46 disruption of the circadian machinery could trigger harmful events due to dysregulation of  
47 homeostasis, resulting in increased risk of lung tumor development.

48 The mammalian circadian machinery consists of an autoregulatory transcription-  
49 translation feedback loop. Its positive arm — heterodimers of circadian locomotor output cycles  
50 kaput (CLOCK) and brain and muscle ARNT-like protein 1 (BMAL1) — drives the transcription  
51 of two inhibitory arms — periods (PERs) and cryptochromes (CRYs) on one hand and nuclear  
52 receptor subfamily 1 group D members 1 and 2 (NR1D1/NR1D2 also called REV-ERB $\alpha$ /REV-  
53 ERB $\beta$ ) on the other. While PERs and CRYs inhibit the BMAL1-CLOCK heterodimer  
54 transactivation function, REV-ERBs repress BMAL1 expression. These transcription-translation  
55 feedback loops drive 24-hour periodic expression of gene products leading to rhythmic  
56 physiologic functions. Accumulating evidence demonstrates that circadian clock components play  
57 critical roles in regulating several hallmarks of cancer, including control of cell proliferation, cell  
58 death, DNA repair, and metabolic alteration (15-17). However, the precise mechanisms  
59 underlying the cooperation between circadian clock disruption and tumorigenesis remain poorly  
60 understood. By manipulating lighting schedules to mimic the circadian disturbance that humans  
61 encounter during rotating shift work or frequent eastbound transmeridian flights (chronic jetlag,  
62 CJL), we show that this environmental light disruption alters gene expression in liver and lungs of  
63 mice. Further, we show that *Kras*<sup>LSL-G12D/+</sup> (K) mice, a genetically engineered mouse model  
64 (GEMM) of NSCLC (18), developed many more tumors when housed in CJL compared to  
65 normal light conditions (12 hours of light; 12 hours of darkness; 12:12LD). Unbiased RNA  
66 sequencing and gene expression analyses revealed a profound disruption of the circadian clock  
67 machinery and chronic elevation of the heat shock response in lungs of mice exposed to CJL,  
68 indicating that light-induced circadian disruption perturbs homeostatic regulation of HSF1. Given  
69 the strong and growing evidence that HSF1 can facilitate tumorigenesis (19-22), these findings  
70 suggest that chronic elevation of HSF1 signaling could be a key molecular link between circadian  
71 disruption and increased cancer risk.

### 72 73 Results

#### 74 Experimental Chronic Jetlag Disrupts Peripheral Clocks

75 To mimic chronic disruption of a functional circadian timing system, we used a chronic  
76 jetlag (CJL) protocol consisting of an 8-hour light phase advance repeated every 2 or 3 days (Fig.

77 1A). This altered light/dark scheme mimics the circadian disturbance that humans face during  
78 rotating shift work (23, 24) and has been shown to increase tumor development upon Glasgow  
79 osteosarcoma inoculation (25), in chemically-induced or spontaneous mouse liver cancer models  
80 (26, 27), and in a mouse model of lung cancer similar to the one used here (3). To first assess the  
81 magnitude of the disturbance of this protocol on the clock machinery and other cancer-related  
82 pathways, male and female C57BL/6J mice were housed in either normal light (12:12LD) or CJL  
83 conditions for 8 weeks before tissues were collected every 4 hours over a 24-hour period.  
84 Importantly, the timing of light-dark transitions on the day of collection (Day 1 in Fig. 1A) were  
85 the same for at least 24 hours before the collection (Day 7 in Fig. 1A). As expected, CJL greatly  
86 impacted the expression of core clock genes in lung, liver, and to a lesser extent spleen, with loss  
87 of periodic expression ( $P^{\text{JTKCycle}} < 0.05$ ) for most of the genes, including *Bmal1*, *Cry1* and *Rev-*  
88 *Erba* (Fig. 1B, fig. S1). Similarly, the components of the clock machinery were profoundly  
89 disrupted at the protein level (Fig. 1C, fig. S1C). While these data are consistent with a model in  
90 which circadian rhythms of gene expression are suppressed or disrupted by CJL, we cannot  
91 exclude the possibility that the loss of observed rhythmicity for some genes is caused by a lack of  
92 synchrony between animals or an inability to properly assign individual animals to a specific  
93 circadian “phase” rather than loss of rhythmicity within individual mice based on this analysis.  
94 Nonetheless, the observation that *Per2* remains rhythmic in mice exposed to CJL while *Rev-Erba*  
95 for example does not, suggests a desynchronization of the core clock components relative to each  
96 other. Interestingly, CJL exposure impacted daily rhythms of core clock genes somewhat  
97 differently in male versus female mice (fig. S1). These disparities are consistent with previous  
98 studies suggesting sexual dimorphism in circadian clock mechanism and physiology (28).

99 The expression of clock-controlled genes was also impacted by CJL. *Wee1* is a critical  
100 regulator of the G2/M transition of the cell cycle that is under circadian control via BMAL1-  
101 CLOCK activation that targets E-box elements in the *Wee1* gene promoter (29). *Wee1* expression  
102 was strongly influenced by the time of day in healthy lungs and was robustly impacted by CJL  
103 (Fig.1D). CJL also profoundly altered the diurnal expression of *Cxcl5* (Fig.1D), a key chemokine  
104 for recruiting neutrophils to the lung upon bacterial and viral exposures (30-32) that is regulated  
105 by REV-ERB $\alpha$  and REV-ERB $\beta$  (33). However, expression of the cell cycle regulators *p53* and  
106 *p21*, and oncogenic transcription factor *c-Myc*, each of which can be regulated by circadian clock  
107 factors (34-36), were not affected by CJL in lung tissue (Fig.1D). Although p53 and c-MYC are  
108 regulated post-translationally by clock components (35, 36) and exhibit rhythmic expression that  
109 is impacted by exposure to altered lighting conditions in mouse thymus (23), we did not observe  
110 any clear effect of CJL on the levels of these proteins in the lungs of healthy mice (Fig. 1E).

111 In an earlier study of mice with mammary tumors in the FVB genetic background, chronic  
112 disruption of light exposures dramatically increased weight gain (37). In contrast, we found that  
113 CJL had no impact on body weight in healthy C57BL/6J mice (fig. S2A). Interestingly, we  
114 observed CJL-induced differences in rhythmic corticosterone levels in serum of female mice only,  
115 suggesting a more rapid light entrainment for corticosterone secretion in males and sexual  
116 dimorphism in hormonal responses (fig. S2B). In a separate group of mice that were housed first  
117 in 12:12LD for 2 weeks and then in CJL for 13 weeks with access to a running wheel, we  
118 confirmed disruption of rhythmic behavior upon CJL; while the locomotor activity was mostly  
119 consolidated within the dark phases, the pattern and amplitude of activity during the dark hours  
120 dramatically changed after only one week of CJL (fig. S3A-E).

## 121 **Experimental Chronic Jetlag Increases *Kras*<sup>G12D</sup>-driven Lung Tumor Burden**

122 In order to investigate molecular mechanisms related to light-induced circadian disruption  
123 in lung tumorigenesis, we used a genetically-engineered mouse model of Non-Small Cell Lung  
124 Cancer in which tumor formation is initiated by expression of oncogenic *Kras*<sup>G12D</sup> in a small  
125 number of lung cells (*Kras*<sup>LSL-G12D/+</sup> mice, also known as K mice) – a model established to  
126 recapitulate many of the clinical features of naturally occurring KRAS-driven lung cancer (38).

127 Male and female K mice were first infected intratracheally with lentivirus expressing CRE  
128 recombinase under the control of the *Ubc* promoter to induce tumorigenesis, and five weeks later  
129 were placed in 12:12LD or CJL conditions, ensuring that tumor initiation rates and the first 5  
130 weeks of tumor growth were under standard conditions before the onset of CJL, as previously  
131 reported (39). At 25 weeks post-infection (20 weeks in CJL), we observed a striking 60% increase  
132 in tumor burden in K mice housed in CJL conditions compared to those that had remained in  
133 12:12LD (Fig. 2A,B). This was attributed to an increase in the number (Fig. 2C) and not the size  
134 (Fig. 2D) of tumors, suggesting that CJL impacts early events in tumor progression in this model.  
135 Moreover, there was no difference in the spectrum of tumor grades assessed by histopathology  
136 (38) between the two groups, with most of the tumors being grade 2 adenomas (Fig. 2E). There  
137 was no impact of CJL on overall survival (Fig. 2F), indicating that additional factors precipitating  
138 death in K mice appeared stochastically in both light conditions. An earlier study demonstrated  
139 that CJL increased tumor burden in *K-ras<sup>LSL-G12D/+</sup>;p53<sup>flax/flox</sup>* (KP) mice, but to a much lesser  
140 extent than we observed in K mice (39). Consistent with this, we did not observe any effects of  
141 CJL on lung tumor burden, numbers, grading, or overall survival in KP mice (fig. S4), which  
142 harbor simultaneous activation of oncogenic K-RAS and deletion of tumor suppressor protein  
143 p53, and thus experience more rapid and severe tumor progression. Technical differences that  
144 resulted in overall lower tumor burden in the KP mice studied by Papagiannakopoulos et al., may  
145 have enabled them to observe an effect of CJL where we did not.

### 146 **c-MYC levels in K mice do not explain increased tumor burden upon CJL**

147 The c-MYC oncoprotein has been shown to play a crucial role in the growth of KRAS-  
148 driven lung tumors (40) and c-MYC accumulation in mouse thymus exhibits a daily rhythm and is  
149 robustly elevated at all times of day after exposure to a single shift of light exposure (23).  
150 Furthermore, genetic deletion of *Bmall* or loss-of-function of PER2 enhanced c-MYC  
151 accumulation in *Kras<sup>G12D</sup>*-driven lung tumors (3). The circadian transcriptional repressor CRY2  
152 can recruit phosphorylated substrates, including c-MYC (36), to the SCF<sup>FBXL3</sup> ubiquitin ligase,  
153 thereby promoting their ubiquitination and proteasomal degradation. We thus expected that CJL  
154 could promote tumorigenesis by perturbing the expression of CRY2, resulting in aberrant  
155 accumulation of c-MYC. Unexpectedly, CJL resulted in significantly reduced accumulation of c-  
156 MYC in *Kras<sup>G12D</sup>*-driven lung tumors as assessed by immunohistochemistry and Western blotting  
157 (fig. S5). Thus, while aberrant stabilization of c-MYC may contribute to enhanced cell growth  
158 and transformation caused by deletion or suppression of circadian clock components (3, 36), it  
159 does not appear to play a major role in the enhanced tumorigenesis caused by circadian disruption  
160 of environmental light exposure in the context of KRAS-driven lung cancer.

### 161 **CJL further disrupts an already dysregulated clock machinery in tumors from K mice**

162 To identify mechanisms potentially underlying the pro-tumorigenic effect of CJL in K  
163 mice, we compared the transcriptional programs in tumors and total lung from K mice housed in  
164 normal or CJL conditions. Up to 12 individual tumors were collected from each animal at either  
165 ZT9 or ZT21 and the remaining lung tissue was also collected for subsequent analyses. We chose  
166 these two time points as they represent the trough and peak, respectively, of expression of the  
167 core clock component, *Bmall*, in healthy lung under normal light conditions. We sequenced RNA  
168 prepared from 3 tumors per animal and two mice per time point and lighting condition (Fig. 3A).  
169 To gain unbiased insight into transcriptional networks perturbed by CJL, we used differential  
170 expression analysis (DESeq2) (41). The ‘whole lung’ samples also contain several tumors, but the  
171 tumor tissue represents a smaller fraction of the whole compared to the tumor samples. Pathway  
172 enrichment analysis confirmed up-regulation of KRAS signaling in resected tumors compared to  
173 whole lung samples for all conditions combined (fig. S6A). When looking at each time point  
174 individually for tumors, we identified 53 and 85 genes differentially expressed between 12:12LD  
175 and CJL at ZT9 and ZT21, respectively, with 20 genes differentially expressed at both time points

(Fig. 3B,C, fig. S6B). The expression changes for these 20 genes were inverted between ZT9 and ZT21 (fig. S6B), suggesting that their expression is under circadian control. Core clock genes and highly rhythmic transcription factors *Tef* and *Dbp* were among the most differentially expressed genes in all groups, and not surprisingly DAVID analyses highlighted biological circadian rhythms and rhythmic processes in the cluster with the highest enrichment score for tumor groups at each time point (fig. S6C). Transcript analyses by qPCR of different tumors and additional lung samples validated these findings, demonstrating significant variations in *Bmal1*, *Per2* and *Rev-erb $\beta$*  mRNA between tumors from K mice housed in 12:12LD and CJL conditions (Fig. 3D). Notably, rhythmic expression of core clock genes was retained in tumors from mice housed in the 12:12LD standard light condition, but the amplitude of some clock gene expression such as *Per2*, *Cry2* and *Rev-erba* was reduced in tumor samples compared to whole lungs (Fig. 3D). This is consistent with several studies demonstrating dampening of circadian rhythms in tumors, mediated by oncogenic factors such as c-MYC or RAS (42, 43). Similar results were observed at the protein level, with a particularly dramatic reduction in REV-ERB $\alpha$  at the peak of its normal expression (ZT9) in tumors compared to total lung from K mice housed in 12:12LD (Fig. 3E). REV-ERB $\alpha$  was not detected at the trough of its expression (ZT21) in either tumors or total lung, indicating that rhythmicity of REV-ERB $\alpha$  was probably retained in tumors but with a greatly diminished amplitude. Moreover, REV-ERB $\alpha$  protein levels were very low under CJL conditions in both tumors and total lung samples at these two time points, but given its very high amplitude of expression, we cannot exclude the possibility that CJL caused a shift in the phase of REV-ERB $\alpha$ .

To further assess whether CJL disrupts the clockwork in tumors from K mice, we used the clock correlation distance (CCD) algorithm, which infers the regularity of circadian clock progression in a group of samples based on the correlated co-expression of 12 clock genes (44). A higher CCD score indicates a more profound disruption of circadian rhythmicity. Originally, the CCD method was designed to evaluate circadian clocks in human cancer and revealed that clock gene co-expression in tumors is consistently perturbed compared to matched healthy tissue. Because our whole lung samples contain both healthy lung tissue and tumors, we compared the CCD score from our 12:12LD tumors ( $n = 12$ ) - calculated using our data acquired by sequencing RNA - to that calculated using published data from murine healthy lung (45). This analysis revealed that the CCD score for healthy mouse lung was lower than the CCD score for tumors from K mice housed in 12:12LD. Moreover, we found that the CCD score for tumors from CJL-housed mice was higher than the CCD score for tumors collected from control animals (Fig. 3F), although the difference between groups is not statistically significant, likely due to limited numbers of samples. Together, these results strongly suggest a dysregulation of circadian clock progression in tumors from K mice compared to healthy lung tissue under normal light condition, and that exposure to CJL further perturbs an already disrupted clock within KRAS<sup>G12D</sup>-driven lung tumors.

### HSF1 signaling is upregulated in response to CJL in K mice

Because we were primarily interested in identifying gene networks that were consistently impacted by circadian disruption within both tumors and lungs without time of sample collection as confounding factor, we searched for transcripts that were differentially expressed between all the samples (tumors + lungs) collected from mice housed in control 12:12LD lighting conditions compared to those housed in CJL lighting conditions. This comparison revealed that genes encoding various heat shock proteins (HSPs) are upregulated in samples from CJL-exposed K mice (Fig. 4A). The same analysis including only tumor samples gave very similar results (fig. S7A). The expression of HSPs is primarily activated by the heat shock response-associated transcription factor heat shock factor 1 (HSF1) in response to pathologic insults that disrupt cytosolic proteostasis, including modest changes in temperature and oxidative stress (46, 47).

225 HSPs function to enhance proteostasis capacity of the cell and prevent the pathologic  
226 accumulation of potentially toxic protein aggregates (48). Accordingly, DAVID analysis pointed  
227 to stress response and response to unfolded protein in the cluster with the highest enrichment  
228 score (Fig. 4B, fig. S7B). Strikingly, all of the transcripts that are significantly elevated in  
229 samples from mice exposed to CJL are known transcriptional targets of HSF1 (49). Gene Set  
230 Enrichment Analysis (GSEA) provided further support for the idea that CJL leads to an elevated  
231 HSF1-mediated heat shock response upon CJL in these samples (Fig. 4C). Moreover, this CJL-  
232 driven activation of HSF1 in K mice appeared to be selective, as we did not observe increased  
233 expression of genes regulated by other stress-responsive signaling pathways (Fig. 4D) (50).  
234 Consistent with dysregulation of clock gene expression measured by qPCR (Fig. 3D), we also  
235 observed a significant decrease in expression of a set of previously defined BMAL1 target genes  
236 (44) (Fig. 4D, right). Transcript analyses by qPCR from different tumors and additional lung  
237 samples validated these findings and highlighted a more pronounced upregulation of HSF1 target  
238 gene expression at ZT21 in whole lungs from mice exposed to CJL compared to normal light  
239 conditions (Fig. 4E).

240 HSF1 broadly influences tumor biology (21). Notably, HSF1 activates a distinct  
241 transcriptional program in malignant cells, dubbed the HSF1 cancer signature, or HSF1-CaSig  
242 (51). We created a gene matrix based on the HSF1-CaSig defined in (51) and used GSEA to show  
243 that samples from CJL-exposed mice also exhibit robustly enriched expression of the HSF1-  
244 CaSig network compared to lungs and tumors from control mice (Fig. 4F). BCL2-associated  
245 athanogene 3, *Bag3*, is a molecular chaperone and HSF1 target gene that is part of the HSF1-  
246 CaSig network, and is involved in apoptosis evasion (52). qPCR revealed that *Bag3* is  
247 significantly upregulated in whole lung collected at ZT21 from K mice exposed to CJL compared  
248 to normal light conditions (Fig. 4G), mirroring changes measured for other HSF1 target genes,  
249 like *Hspa1a* (Fig. 4E).

250 Interestingly, applying GSEA to a previously published gene expression profiling dataset  
251 of *Kras*<sup>G12V</sup>-driven lung hyperplasia and normal murine lung cells (53) showed that both the  
252 HSF1-mediated heat shock response and HSF1-CaSig gene sets were significantly enriched in  
253 hyperplastic lesions compared to normal lung cells (fig. S7C). However, these gene sets were not  
254 significantly enriched in frank adenocarcinoma compared to hyperplastic lesions in the same  
255 dataset (fig. S7D). This suggests that activation of HSF1 signaling occurs at early stages of  
256 KRAS-driven lung cancer development.

## 257 **Rhythmic HSF1 nuclear accumulation and transcriptional activity is perturbed by CJL**

258 Previous studies show that nuclear HSF1 levels fluctuate daily in the liver of mice and  
259 chipmunks in phase with body temperature rhythms, and that HSF1 acts as a circadian  
260 transcription factor (54, 55). To determine if this was also the case in lung tissue and to assess the  
261 impact of CJL exposure on this regulation, we measured HSF1 protein levels in lung nuclear  
262 extracts over 24 hours from C57BL/6J mice housed in 12:12LD or CJL conditions (Fig. 5A,B).  
263 Lung nuclear HSF1 protein levels exhibited robust diurnal oscillations, peaking during the dark  
264 phase, under normal light conditions. Interestingly, upon CJL exposure, the amplitude of this  
265 rhythm was dampened but the phase was retained (or only slightly shifted) leading to enhanced  
266 accumulation of nuclear HSF1 at the beginning of the light phase. In contrast, total HSF1 protein  
267 levels exhibited a moderate rhythm with lower amplitude and different phase than nuclear HSF1  
268 levels (fig. S8). The expression profiles of HSF1 target genes from a different cohort of mice  
269 mirrored diurnal HSF1 nuclear localization (Fig. 5C), with enhanced expression upon CJL from  
270 the end of dark phase through the beginning of the light phase. These results were also consistent  
271 with increased expression of HSF1 target genes that we observed at ZT21 in K mice exposed to  
272 CJL (Fig. 4E). These findings indicate that CJL perturbs homeostatic regulation of HSF1

273 transcriptional activity in the lung, which could lead to enhanced tumor initiation in combination  
274 with other oncogenic factors.

## 275 **HSF1 signaling affects human KRAS-mutant lung cancer**

276 To gain insight into the potential for HSF1 to influence human lung adenocarcinoma, we  
277 treated human lung cancer cell lines with a novel Direct Targeted HSF1 InhiBitor (DTHIB) that  
278 has been shown to stimulate degradation of nuclear HSF1 and suppress the growth of prostate  
279 cancer xenografts (56). We confirmed the potency of DTHIB for suppressing HSF1  
280 transcriptional activity in HEK293T cells expressing a Heat Shock Element (HSE)-Luciferase  
281 reporter in which HSF1 is stimulated with the activating ligand A3 (57) (fig. S9A). We found that  
282 inhibiting HSF1 with DTHIB slowed the growth of two human lung adenocarcinoma (LUAD)  
283 cell lines harboring heterozygous KRAS<sup>G12D</sup> mutations (A-427 and SK-LU-1 cells) in a dose-  
284 dependent manner (Fig. 6A,B; fig. S9B,C for later treatment). We confirmed significant reduction  
285 in the protein levels of HSF1 and downstream chaperone DNAJB1 (HSP40) in A-427 cells  
286 treated with 5  $\mu$ M DTHIB for 48 hours, confirming compound activity in this model (Fig. 6C,D).  
287 We did not detect a significant change in KRAS<sup>G12D</sup> protein level upon DTHIB treatment.  
288 However, two downstream effectors of RAS signaling (phosphorylation of ERK1/2 and  
289 accumulation of c-MYC) were significantly decreased (Fig. 6C,D), suggesting impairment of  
290 RAS signaling in these cells upon pharmacologic inhibition of HSF1. Altogether, these results  
291 indicate that HSF1 is an important contributor to cellular proliferation in two cell models of  
292 KRAS-driven LUAD.

293

## 294 **Discussion**

295 Several molecular hypotheses have been proposed to explain the increased cancer risk  
296 associated with circadian disruption. Studying the impact of circadian disruption in genetically  
297 engineered mouse models of cancer enables us to identify molecular changes that occur in  
298 response to chronic jetlag and investigate their contributions to enhanced cancer risk in a  
299 controlled environment. Here, we show that circadian disruption promotes lung tumorigenesis in  
300 K mice, a genetically-engineered mouse model in which tumor formation is initiated by  
301 expression of oncogenic *Kras*<sup>G12D</sup> in a small number of lung cells that recapitulates many of the  
302 clinical features of naturally occurring KRAS-driven lung cancer (38, 58). This provides  
303 additional evidence of the impact of circadian disruption on lung cancer as previously reported in  
304 a related but more severe lung cancer mouse model (3). Interestingly, the CJL protocol used  
305 affects the number of tumors detected but not their size. This indicates that circadian disruption  
306 impacts early events in *Kras*<sup>G12D</sup>-driven tumor progression or prevents regression of initiated  
307 tumors rather than enhancing the growth of well-established tumors. We further demonstrated that  
308 HSF1 signaling is significantly elevated in mice exposed to altered light/dark cycles, revealing a  
309 novel mechanism of action that likely contributes to increased tumor formation in response to  
310 circadian disruption.

311 The CJL protocol used in our studies, consisting of repeated light advances and mimicking  
312 the effects of rotating shift work or frequent eastbound transmeridian flights, has been previously  
313 shown to cause severe perturbations in rest-activity cycles and body temperature (3, 25, 26, 59).  
314 By housing mice in constant darkness for two days after ten days of this CJL protocol exposure  
315 (to avoid any masking effect of light on circadian rhythmic patterns) previous work has  
316 demonstrated that this protocol caused dysregulation of circadian rhythms of gene expression in  
317 the SCN and peripheral organs (25, 26, 60). In our studies, mice were kept in their respective light  
318 schedule and tissues were sampled when all mice experienced the same light exposures for at  
319 least 24 hours prior to sample collection. In that way, we aimed to assess the effects of CJL in a  
320 normal light exposure context, which is more representative of what humans experience after shift  
321 work or frequent eastbound flights. As expected, we found that peripheral clocks cannot adjust

322 their timing rapidly enough to maintain synchrony with the shifting of the environment.  
323 Interestingly, it appeared that some clock genes, including *Per2*, remained rhythmic after CJL  
324 exposure while others (e.g. *Bmal1*) did not, consistent with prior work indicating that *Per2* is  
325 more sensitive to entrainment signals in peripheral tissues than other core clock genes (61).

326 Our analysis of gene expression in tumors and tumor-bearing lung tissues from animals  
327 housed in standard or CJL conditions demonstrated that the clock machinery was highly disrupted  
328 by CJL in both tumors and lung tissue. Accumulating evidence reveals that circadian clock  
329 components play critical roles in several hallmarks of cancer, including cell proliferation, DNA  
330 damage and repair, and cell death (15), suggesting that disruption of cellular circadian rhythms  
331 within tumors could contribute to the detrimental impact of irregular light exposure in cancer. In  
332 support of this idea, previous work established that K mice, the same *Kras*<sup>G12D</sup>-driven NSCLC  
333 mouse model that we used, develop a greater tumor burden when the core circadian clock  
334 component *Bmal1* is deleted specifically within tumors (3). Conversely, previous studies have  
335 shown that circadian functions in cancer cells are compromised or deregulated (44), in some cases  
336 due to high expression of oncogenic c-MYC (42) or RAS (43). However, circadian disruption  
337 does not seem to be a universal feature of cancer, because some cancer cells, such as melanoma,  
338 Acute Myeloid Leukemia cells and patient-derived cancer stem cells (CSCs) of glioblastoma  
339 harbor an intact circadian clock despite their highly tumorigenic and metastatic potential (62-64).

340 Here, we demonstrate that chronic circadian disruption *in vivo* enhances the expression of  
341 HSF1 target genes. HSF1 promotes expression of heat shock proteins (HSPs) to protect the  
342 proteome, allowing cells to survive diverse proteotoxic stresses. Over the past decade, it has  
343 become clear that HSF1 activity is exploited by cancer cells to overcome diverse stresses and  
344 intrinsic and extrinsic demands (65). High levels of HSF1 and HSF1-regulated HSPs have been  
345 measured in different types of cancers and are negatively correlated with prognosis in patients  
346 (66, 67), including those with NSCLC (68). Accordingly, in various human cancer cell lines and  
347 murine cancer models, deletion of HSF1 markedly reduces growth, survival and metastatic  
348 potential (21, 51, 69-72), whereas its overexpression enhances the malignant phenotypes of  
349 xenografted human melanoma cells *in vivo* (73). Several mechanisms have been proposed to  
350 contribute to the role of HSF1 in supporting malignancy, including regulation of HSPs expression  
351 and regulation of an unique transcriptional program activated by HSF1 in cancer cells dubbed the  
352 HSF1 cancer signature (HSF1-CaSig) (51). Notably, the HSF1-CaSig was up-regulated in tumor-  
353 bearing K mouse lung upon CJL exposure (Fig. 5F). Regulation of cancer cell proteostasis by  
354 HSPs is an important feature for cancer cell survival and proliferation (74) and recently, HSPs  
355 have drawn increased attention as potential targets in cancer, especially given the role of such  
356 stress proteins in promoting resistance to conventional therapies (75). Specifically, growing  
357 evidence of correlation between *Hsps* expression profile and degree of differentiation and staging  
358 of lung tumors suggest that these proteins could be considered as therapeutic targets and  
359 biomarkers for lung cancer patient management (76, 77). Indeed, mutant oncoproteins, such as  
360 KRAS<sup>G12D</sup>, may depend on HSF1-dependent regulation of HSPs to enable folding and to maintain  
361 full activity. Although we did not detect a significant change in KRAS<sup>G12D</sup> protein level upon  
362 pharmacological inhibition of HSF1, its activity appeared to be impaired as measured by  
363 significant down-regulation of the phosphorylation levels of its downstream effectors ERK1/2.  
364 These findings are consistent with previous observations, in other contexts, that HSF1 supports  
365 transformation and tumorigenesis via activation of oncogenic RAS signaling (71, 78).

366 Our work also adds to a growing body of evidence indicating robust circadian regulation  
367 of HSF1 activity, both in healthy and tumor-bearing lung tissue. As in the liver (54), HSF1  
368 nuclear accumulation in the lung is dependent on the time of day, peaking at night under normal  
369 light conditions. Daily rhythmic nuclear accumulation of HSF1 is associated with rhythmic  
370 expression of *Hsps*, which peak in the middle of the dark phase, around ZT16. Exposure to CJL



371 disrupted these rhythms mainly by preventing the reduction of their expression that is seen  
372 between ZT20 and ZT4 under normal conditions. Interestingly, fluctuations in body temperature  
373 have been shown to act as a major entrainment factor for rhythmic HSF1 activity (54), and  
374 compared to day-shift nurses, night-shift nurses exhibited significant differences in peripheral  
375 skin temperature, with notably higher minimum temperature but unchanged maximum  
376 temperature (79, 80). Therefore, activation of HSF1 due to abnormal changes in body temperature  
377 could be a key component in the connection between shift work and cancer risk.

378 Numerous cell-autonomous and systemic mechanisms are susceptible to alteration upon  
379 circadian disruption and can influence tumorigenesis. In this work, we revealed that circadian  
380 disruption impacts early events in tumor formation in a KRAS-driven mouse model of lung  
381 adenocarcinoma. Further, we demonstrated that HSF1 signaling in the lung and lung tumors is  
382 dysregulated by exposure to altered environmental lighting schedules. HSF1 has been shown to  
383 support tumorigenesis in myriad ways (81), suggesting that the enhanced HSF1 activity that we  
384 observed in response to circadian disruption could play an important role in increased tumor  
385 formation. Additional investigation is needed to determine whether the chronic elevation of HSF1  
386 signaling that we measured in lungs in response to circadian disruption occurs early in the disease  
387 process, whether it is present in other anatomical locations, and whether HSF1 is required for  
388 increased tumorigenesis in response to circadian disruption. We demonstrated that a novel direct  
389 HSF1 inhibitor (DTHIB), previously shown to potently attenuate tumor progression in therapy-  
390 resistant prostate cancer models (56), reduced growth of two different human KRAS-driven lung  
391 cancer cell lines. To further define the determinants of susceptibility to growth inhibition by  
392 DTHIB, it will be necessary to examine additional cell lines and to investigate the impact of  
393 genetic manipulation of HSF1, KRAS, and other factors on growth inhibition by DTHIB. Of  
394 particular relevance for connecting HSF1-related therapeutic opportunities to circadian disruption,  
395 an HSP90 inhibitor reduced the growth of mouse melanoma in a time-of-day-specific manner,  
396 which depended on an intact core clock system in the tumors (82). Our findings described herein  
397 demonstrate that HSF1 and its downstream effectors, the HSPs, are potential therapeutic targets  
398 for mitigating cancer risk among populations exposed to chronic circadian disruption, such as  
399 shift workers.

## 400 **Materials and Methods**

### 401 **Mouse Models**

402 C57BL/6J mice were purchased from the Scripps Research breeding colony at six weeks  
403 of age. They were group housed except when given voluntary access to running wheels, in which  
404 case they were singly housed in running wheel cages. Genetically engineered mouse models,  
405  $Kras^{LSL-G12D/+}$  (K) and  $Kras^{LSL-G12D/+};p53^{flox/flox}$  (KP), all in pure C57BL/6J background, were  
406 obtained from the Jackson Laboratory, and have been previously described (38, 58). When they  
407 were between eight and ten weeks old, mice were infected intratracheally with lentivirus  
408 containing Cre recombinase, lenti-Cre (PGK-Cre, gift from Tyler Jacks), at a viral titer of  $5 \times 10^5$   
409 plaque forming units (PFU) per mouse according to the previously established protocol (38). All  
410 experiments utilized both female and male mice. They were given ad libitum access to normal  
411 mouse chow and water. Sacrifices during the dark phase were carried out under red light. All  
412 animal care and treatments were in accordance with Scripps Research guidelines for the care and  
413 use of animals, and approved by the Scripps Research Institutional Animal Care and Use  
414 Committee (IACUC) under protocol #10-0019.

### 415 **Chronic Jetlag (CJL) Conditions**

416 Mice were randomly placed into standard light conditions (12:12LD) or chronic jetlag  
417 (CJL) consisting of an 8-hour light phase advance repeated every 2 or 3 days (3, 23, 60). For  
418

419 GEMM studies, mice were housed in these light conditions 5 weeks post infection with lenti-Cre,  
420 for 10 or 20 weeks for KP and K mice respectively, or until showing signs of distress for the  
421 survival studies.

## 422 **Running Wheel Activity Analysis**

423 C57BL/6J mice were single housed and given access to running wheels with ad libitum  
424 access to food and water for several weeks, under specific light conditions as indicated in the  
425 figure legends. Voluntary running wheel activity was analyzed with ClockLab (Actimetrics) using  
426 digital recordings of wheel rotations.

## 427 **Histology and tumor burden analyses**

428 Mice were euthanized by carbon dioxide asphyxiation. Lungs were inflated through the  
429 trachea with 4% paraformaldehyde (PFA), fixed overnight, transferred to 70% ethanol and sent to  
430 the Rodent Histopathology Core facility at Harvard Medical School for subsequent paraffin-  
431 embedding and sectioning at a thickness of five micrometers. Sections were stained with  
432 haematoxylin and eosin (H&E) for pathological examination. Histopathological grading of  
433 tumors and quantification of tumor numbers were performed with the assistance of Dr. Roderick  
434 Bronson, histopathologist at Harvard Medical School. Tumor size of each individual tumor was  
435 measured from H&E stained sections using morphometric analysis in Panoramic viewer software  
436 (Perkin Elmer). Tumor burden, calculated as a percentage of tumor area per total lung area per  
437 mouse, was quantified from H&E stained sections using a Nuance automated spectral imaging  
438 system (Inform v2.1 software, Cambridge Research and Instrumentation). In brief, the Trainable  
439 Tissue Segmentation method was trained to identify tumor, normal lung, vessel and space. This  
440 program was then applied to all H&E images, and each of the resulting mapped images was then  
441 screened to verify that accurate tissue segmentation had occurred.

## 442 **Immunohistochemistry**

443 Slides were deparaffinized and rehydrated. Antigen retrieval was performed at high heat  
444 (95°C) for 10 minutes in citrate buffer pH 6.0. Endogenous peroxidase activity was quenched  
445 with Bloxall (VectorLabs) for 10 minutes. Slides were blocked for 1 hour using 10% Normal  
446 Goat Serum (Invitrogen), incubated overnight with primary antibody. After 1-hour incubation  
447 with secondary antibody, VectaElite (VectorLabs) was applied on the sections for 30 minutes.  
448 Staining was visualized using DAB Peroxidase Substrate Kit (Vector Labs, SK-4100). Slides  
449 were counterstained with hematoxylin, dehydrated, and mounted with refrax mounting medium.  
450 Immunostained slides were scanned using a Perkin Elmer Slide Scanner (Panoramic MIDI Digital  
451 SlideScanner). Inform v2.1 image analysis software (Cambridge Research and Instrumentation)  
452 was used as a non-biased method to quantitate staining as previously described (83). Quantitation  
453 of c-MYC positive nuclei was performed using tumors of the same histological grade.

## 454 **RNA-sequencing**

455 RNA from lung tumors and remaining lung tissues was isolated using Qiazol reagent  
456 using standard protocols (Qiagen cat # 799306). RNA purity was assessed by Agilent 2100  
457 Bioanalyzer. Total RNA samples were sent to BGI Group, Beijing, China, for library preparation  
458 and sequencing. Reads (single-end 50bp at a sequencing depth of 20 million reads per sample)  
459 were generated by BGISEQ-500.

## 460 **RNA-seq analysis**

461 Kallisto (<https://pachterlab.github.io/kallisto/>) was used to align to the reference  
462 transcriptome ([ftp://ftp.ensembl.org/pub/current\\_fasta/mus\\_musculus/cdna/](ftp://ftp.ensembl.org/pub/current_fasta/mus_musculus/cdna/)) and estimate  
463 transcript abundance. Differential gene expression analysis (DESeq2) was carried out using R  
464 (<https://www.r-project.org/>). Differentially expressed genes were defined as having a adj. p-

value < 0.05 and fold change > +/- 0.5. Gene ontology (GO) analysis was conducted on selected genes using the Database for Annotation, Visualization and Integrated Discovery (DAVID) (<https://david.ncifcrf.gov/>) program. Gene Set Enrichment Analysis (GSEA) (<https://www.gsea-msigdb.org/gsea/index.jsp>) was generated with TPM values from the above experiment using the java GSEA package.

## Lung nuclear extracts

Freshly collected lungs were mechanically homogenized in sucrose solution, and nuclei were isolated by ultracentrifugation through a denser layer of sucrose. Briefly, the whole lung was placed into a large (15 ml) dounce homogenizer on ice containing about 4 ml ice-cold PBS and 4 ml ice-cold homogenization solution (2.2 M sucrose with protease inhibitors, DTT and PMSF). Tissue was disrupted by pressing piston up/down 6x with loose piston and then 4x with tight piston. Homogenized tissue was added to an additional volume of ice-cold homogenization solution for a total volume of about 33 ml, which was then slowly poured on top of 10 ml cushion solution (2.05M sucrose with protease inhibitors, DTT and PMSF) in the ultracentrifugation tube (Beckman polyallomer #326823). After a 45-min spin at 24,600 rpm in pre-chilled SW32Ti rotor at 4°C, supernatants were carefully aspirated (the white pellets contain the nuclei). Nuclei were resuspended in 500 µl nuclear resuspension buffer (5mM Hepes pH 7.6; 50mM KCl and EDTA with DTT, protease inhibitors and PMSF) and transferred into a small (2 ml) dounce homogenizer on ice. Nuclei pellets were further resuspended by pressing piston up/down 3x with loose piston and then 2x with tight piston. Nuclei were then transferred to fresh 1.5 ml tubes and 500 µl of 2X NUN buffer (+ protease inhibitors and PMSF) were added while gently vortexing. After 20-minute incubation on ice, lysates were centrifuged for 20 minutes in ultracentrifuge at 38,000 rpm in pre-chilled 70.1Ti rotor with delrin adapters at 4°C. Supernatants were then transferred to clean tubes prior to protein quantification by BCA assay.

## Cell culture

A-427 and SK-LU-1 cells were purchased from the American Type Culture Collection (ATCC), cultured in Dulbecco's modified Eagles medium (DMEM) plus 10% fetal bovine serum (Thermo Fisher) and 1% Pen-Strep (Gibco), and maintained in an atmosphere containing 5% CO<sub>2</sub> at 37°C.

## Colony Formation Assay

Cells were plated into 6-well plates at 500 cells/well, and media was changed every 2 or 3 days with medium containing DTHIB (MedChemExpress, HY-138280) or corresponding concentration of DMSO. After indicated days of treatment, cells were washed in PBS, fixed for 10min with 100% methanol, and stained with 0.05% crystal violet for 20min. Plates were rinsed in DI-H<sub>2</sub>O, imaged and quantified using ChemiDoc XRS+ System (Bio-Rad).

## HSE-Luc activity

The pGL4.41[luc2P/HSE/Hygro] plasmid (HSE-Luc; Promega) was transfected into HEK293T cells and a stable clone expressing HSE-Luc was selected with hygromycin (200 mg/mL). For activity measurements, cells were plated in a flat, white, clear-bottom 96 well plate at a concentration of 50,000 cells/well. After 6 h, cells were pretreated with DTHIB (5 µM) and/or vehicle overnight. Compound A3 (10 µM; a kind gift from Rick Morimoto, Northwestern), MG132 (10 µM; Sigma), or DMSO was added for an additional 6 h. Plates were then equilibrated to room temperature and lysed by the addition of Bright-Glo reagent (100 µL; Promega) to each well. After a 10 min incubation to stabilize the signal, luminescence was then measured using an Infinite F200 PRO plate reader (Tecan) and corrected for background signal.

## RNA extraction and quantitative RT-PCR

511 RNA was extracted from frozen tissues with Qiazol reagent using standard protocols  
512 (Qiagen cat # 799306). cDNA was prepared using QScript cDNA Supermix (VWR cat # 101414-  
513 106) and analyzed for gene expression using quantitative real-time PCR with iQ SYBR Green  
514 Supermix (Biorad cat # 1708885).

## 515 Western Blots

516 Tissues or cells were lysed in RIPA buffer supplemented with protease and phosphatase  
517 inhibitors. Protein lysates were separated by SDS-PAGE and transferred to polyvinylidene  
518 difluoride (PVDF) membranes. Proteins were detected by standard Western blotting procedures.  
519 Antibodies were diluted 1:1,000 for BMAL1 (Abcam, ab93806), CRY1 and CRY2 (84), c-MYC  
520 (Abcam, ab32072), HSF1 (CST-12972), KRASG12D (CST-14429), Phospho-Erk1/2 (CST-  
521 4370), Erk1/2 (CST-4695); 1:2,000 for REV-ERB $\alpha$  (33), DNAJB1 (Enzo, ADI-SPA-400),  
522 HSP90AA1 (GTX109753); 1:10,000 for LAMIN A (Sigma, L1293); 1:50,000 for ACTIN  
523 (Sigma, A1978). Imaging and band quantification were carried out using ChemiDoc XRS+  
524 System (Bio-Rad).

## 525 Web-based analysis tools

526 Pathway analysis was performed with Enrichr (<http://amp.pharm.mssm.edu/Enrichr>).  
527 Quantifying circadian clock function using clock gene co-expression (CCD method) was carried  
528 using the web application available at <https://hugheylab.shinyapps.io/deltaccd>. Heatmap was  
529 generated by clustering using the Cluster 3.0 program (log<sub>2</sub> transform data, center genes on mean,  
530 Hierarchical clustering with average linkage) (85), and then visualized with Java TreeView  
531 version 1.1.6r4 (86).

## 532 Statistical analysis

533 Statistical analyses were performed using GraphPad Prism 8 software. Unless otherwise  
534 indicated, ANOVA was used to determine significance with a threshold of 0.05 acceptable false  
535 positive ( $P < 0.05$ ). Rhythmicity was determined by JTK\_Cycle analyses (87).

## 537 References

- 538 1. N. O. H. S. (NHIS-OHS), [https://www.cdc.gov/Niosh-whc/chart/ohs-  
539 workorg?OU=WORKSCHED\\_RCD&T=I&V=R2](https://www.cdc.gov/Niosh-whc/chart/ohs-workorg?OU=WORKSCHED_RCD&T=I&V=R2). (2015).
- 540 2. M. Pariollaud, K. A. Lamia, Cancer in the Fourth Dimension: What Is the Impact of  
541 Circadian Disruption? *Cancer discovery* **10**, 1455-1464 (2020).
- 542 3. T. Papagiannakopoulos, Matthew R. Bauer, Shawn M. Davidson, M. Heimann, L.  
543 Subbaraj, A. Bhutkar, J. Bartlebaugh, Matthew G. Vander Heiden, T. Jacks, Circadian  
544 Rhythm Disruption Promotes Lung Tumorigenesis. *Cell Metabolism* **24**, 324-331 (2016).
- 545 4. F. Gu, S. Xu, S. S. Devesa, F. Zhang, E. B. Klerman, B. I. Graubard, N. E. Caporaso,  
546 Longitude Position in a Time Zone and Cancer Risk in the United States. *Cancer  
547 Epidemiol Biomarkers Prev* **26**, 1306-1311 (2017).
- 548 5. Y. Ye, Y. Xiang, F. M. Ozguc, Y. Kim, C.-J. Liu, P. K. Park, Q. Hu, L. Diao, Y. Lou, C.  
549 Lin, A.-Y. Guo, B. Zhou, L. Wang, Z. Chen, J. S. Takahashi, G. B. Mills, S.-H. Yoo, L.  
550 Han, The Genomic Landscape and Pharmacogenomic Interactions of Clock Genes in  
551 Cancer Chronotherapy. *Cell Syst* **6**, 314-328.e312 (2018).
- 552 6. E. S. Schernhammer, D. Feskanich, G. Liang, J. Han, Rotating night-shift work and lung  
553 cancer risk among female nurses in the United States. *Am J Epidemiol* **178**, 1434-1441  
554 (2013).
- 555 7. S. E. Sephton, E. Lush, E. A. Dedert, A. R. Floyd, W. N. Rebholz, F. S. Dhabhar, D.  
556 Spiegel, P. Salmon, Diurnal cortisol rhythm as a predictor of lung cancer survival. *Brain,  
557 Behavior, and Immunity* **30**, S163-S170 (2013).

- 558 8. R. L. Siegel, K. D. Miller, A. Jemal, Cancer statistics, 2020. *CA: A Cancer Journal for*  
559 *Clinicians* **70**, 7-30 (2020).
- 560 9. J. A. Barta, C. A. Powell, J. P. Wisnivesky, Global Epidemiology of Lung Cancer. *Ann*  
561 *Glob Health* **85**, 8 (2019).
- 562 10. N. The Cancer Genome Atlas Research, Comprehensive molecular profiling of lung  
563 adenocarcinoma. *Nature* **511**, 543-550 (2014).
- 564 11. L. M. Ince, M. Pariollaud, J. E. Gibbs, Lung physiology and defense. *Current Opinion in*  
565 *Physiology* **5**, 9-15 (2018).
- 566 12. J. E. Gibbs, S. Beesley, J. Plumb, D. Singh, S. Farrow, D. W. Ray, A. S. I. Loudon,  
567 Circadian Timing in the Lung; A Specific Role for Bronchiolar Epithelial Cells.  
568 *Endocrinology* **150**, 268-276 (2009).
- 569 13. G. Ferone, M. C. Lee, J. Sage, A. Berns, Cells of origin of lung cancers: lessons from  
570 mouse studies. *Genes Dev* **34**, 1017-1032 (2020).
- 571 14. M. Spella, I. Lilis, M. A. Pepe, Y. Chen, M. Armaka, A.-S. Lamort, D. E. Zazara, F.  
572 Roumelioti, M. Vreka, N. I. Kanellakis, D. E. Wagner, A. D. Giannou, V. Armenis, K. A.  
573 Arendt, L. V. Klotz, D. Toumpanakis, V. Karavana, S. G. Zakyntinos, I. Giopanou, A.  
574 Marazioti, V. Aidinis, R. Sotillo, G. T. Stathopoulos, Club cells form lung  
575 adenocarcinomas and maintain the alveoli of adult mice. *Elife* **8**, e45571 (2019).
- 576 15. A. A. Shafi, K. E. Knudsen, Cancer and the Circadian Clock. *Cancer Research* **79**, 3806  
577 (2019).
- 578 16. S. Masri, P. Sassone-Corsi, The emerging link between cancer, metabolism, and circadian  
579 rhythms. *Nature Medicine* **24**, 1795-1803 (2018).
- 580 17. G. Sulli, M. T. Y. Lam, S. Panda, Interplay between Circadian Clock and Cancer: New  
581 Frontiers for Cancer Treatment. *Trends in Cancer* **5**, 475-494 (2019).
- 582 18. E. L. Jackson, N. Willis, K. Mercer, R. T. Bronson, D. Crowley, R. Montoya, T. Jacks, D.  
583 A. Tuveson, Analysis of lung tumor initiation and progression using conditional  
584 expression of oncogenic K-ras. *Genes Dev* **15**, 3243-3248 (2001).
- 585 19. L. Whitesell, S. Santagata, M. L. Mendillo, N. U. Lin, D. A. Proia, S. Lindquist, HSP90  
586 empowers evolution of resistance to hormonal therapy in human breast cancer models.  
587 *Proceedings of the National Academy of Sciences* **111**, 18297 (2014).
- 588 20. S. Santagata, R. Hu, N. U. Lin, M. L. Mendillo, L. C. Collins, S. E. Hankinson, S. J.  
589 Schnitt, L. Whitesell, R. M. Tamimi, S. Lindquist, T. A. Ince, High levels of nuclear heat-  
590 shock factor 1 (HSF1) are associated with poor prognosis in breast cancer. *Proc Natl Acad*  
591 *Sci U S A* **108**, 18378-18383 (2011).
- 592 21. C. Dai, L. Whitesell, A. B. Rogers, S. Lindquist, Heat shock factor 1 is a powerful  
593 multifaceted modifier of carcinogenesis. *Cell* **130**, 1005-1018 (2007).
- 594 22. W. Qian, K. Chen, T. Qin, Y. Xiao, J. Li, Y. Yue, C. Zhou, J. Ma, W. Duan, J. Lei, L.  
595 Han, L. Li, X. Shen, Z. Wu, Q. Ma, Z. Wang, The EGFR-HSF1 axis accelerates the  
596 tumorigenesis of pancreatic cancer. *J Exp Clin Cancer Res* **40**, 25-25 (2021).
- 597 23. S. Lee, L. A. Donehower, A. J. Herron, D. D. Moore, L. Fu, Disrupting circadian  
598 homeostasis of sympathetic signaling promotes tumor development in mice. *PLoS one* **5**,  
599 e10995-e10995 (2010).
- 500 24. Christoph A. Thaiss, D. Zeevi, M. Levy, G. Zilberman-Schapira, J. Suez, Anouk C.  
501 Tengeler, L. Abramson, Meirav N. Katz, T. Korem, N. Zmora, Y. Kuperman, I. Biton, S.  
502 Gilad, A. Harmelin, H. Shapiro, Z. Halpern, E. Segal, E. Elinav, Transkingdom Control of  
503 Microbiota Diurnal Oscillations Promotes Metabolic Homeostasis. *Cell* **159**, 514-529  
504 (2014).
- 505 25. E. Filipinski, F. Delaunay, V. M. King, M.-W. Wu, B. Claustrat, A. Gréchez-Cassiau, C.  
506 Guettier, M. H. Hastings, L. Francis, Effects of Chronic Jet Lag on Tumor Progression in  
507 Mice. *Cancer Research* **64**, 7879 (2004).

- 508 26. E. Filipinski, P. Subramanian, J. Carrière, C. Guettier, H. Barbason, F. Lévi, Circadian  
509 disruption accelerates liver carcinogenesis in mice. *Mutation Research/Genetic Toxicology*  
510 *and Environmental Mutagenesis* **680**, 95-105 (2009).
- 511 27. N. M. Kettner, H. Voicu, M. J. Finegold, C. Coarfa, A. Sreekumar, N. Putluri, C. A.  
512 Katchy, C. Lee, D. D. Moore, L. Fu, Circadian Homeostasis of Liver Metabolism  
513 Suppresses Hepatocarcinogenesis. *Cancer Cell* **30**, 909-924 (2016).
- 514 28. S. T. Anderson, G. A. FitzGerald, Sexual dimorphism in body clocks. *Science* **369**, 1164  
515 (2020).
- 516 29. T. Matsuo, S. Yamaguchi, S. Mitsui, A. Emi, F. Shimoda, H. Okamura, Control  
517 Mechanism of the Circadian Clock for Timing of Cell Division in Vivo. *Science* **302**, 255-  
518 259 (2003).
- 519 30. J. Mei, Y. Liu, N. Dai, M. Favara, T. Greene, S. Jeyaseelan, M. Poncz, J. S. Lee, G. S.  
520 Worthen, CXCL5 regulates chemokine scavenging and pulmonary host defense to  
521 bacterial infection. *Immunity* **33**, 106-117 (2010).
- 522 31. G. Nouailles, A. Dorhoi, M. Koch, J. Zerrahn, J. Weiner, 3rd, K. C. Faé, F. Arrey, S.  
523 Kuhlmann, S. Bandermann, D. Loewe, H.-J. Mollenkopf, A. Vogelzang, C. Meyer-  
524 Schwesinger, H.-W. Mittrücker, G. McEwen, S. H. E. Kaufmann, CXCL5-secreting  
525 pulmonary epithelial cells drive destructive neutrophilic inflammation in tuberculosis. *The*  
526 *Journal of clinical investigation* **124**, 1268-1282 (2014).
- 527 32. J. Gibbs, L. Ince, L. Matthews, J. Mei, T. Bell, N. Yang, B. Saer, N. Begley, T. Poolman,  
528 M. Pariollaud, S. Farrow, F. Demayo, T. Hussell, G. S. Worthen, D. Ray, A. Loudon, An  
529 epithelial circadian clock controls pulmonary inflammation and glucocorticoid action.  
530 *Nature medicine* **20**, 919-926 (2014).
- 531 33. M. Pariollaud, J. E. Gibbs, T. W. Hopwood, S. Brown, N. Begley, R. Vonslow, T.  
532 Poolman, B. Guo, B. Saer, D. H. Jones, J. P. Tellam, S. Bresciani, N. C. O. Tomkinson, J.  
533 Wojno-Picon, A. W. J. Cooper, D. A. Daniels, R. P. Trump, D. Grant, W. Zuercher, T. M.  
534 Willson, A. S. MacDonald, B. Bolognese, P. L. Podolin, Y. Sanchez, A. S. I. Loudon, D.  
535 W. Ray, Circadian clock component REV-ERB $\alpha$  controls homeostatic regulation of  
536 pulmonary inflammation. *The Journal of Clinical Investigation* **128**, 2281-2296 (2018).
- 537 34. A. Gréchez-Cassiau, B. Rayet, F. Guillaumond, M. Teboul, F. Delaunay, The Circadian  
538 Clock Component BMAL1 Is a Critical Regulator of p21WAF1/CIP1 Expression and  
539 Hepatocyte Proliferation. *Journal of Biological Chemistry* **283**, 4535-4542 (2008).
- 540 35. T. Gotoh, M. Vila-Caballer, C. S. Santos, J. Liu, J. Yang, C. V. Finkielstein, The circadian  
541 factor Period 2 modulates p53 stability and transcriptional activity in unstressed cells. *Mol*  
542 *Biol Cell* **25**, 3081-3093 (2014).
- 543 36. A.-L. Huber, S. J. Papp, A. B. Chan, E. Henriksson, S. D. Jordan, A. Kriebs, M. Nguyen,  
544 M. Wallace, Z. Li, C. M. Metallo, K. A. Lamia, CRY2 and FBXL3 Cooperatively  
545 Degrade c-MYC. *Molecular Cell* **64**, 774-789 (2016).
- 546 37. Kirsten C. G. Van Dycke, W. Rodenburg, Conny T. M. van Oostrom, Linda W. M.  
547 van Kerkhof, Jeroen L. A. Pennings, T. Roenneberg, H. van Steeg, Gijbertus T. J.  
548 van der Horst, Chronically Alternating Light Cycles Increase Breast Cancer Risk in Mice.  
549 *Current Biology* **25**, 1932-1937 (2015).
- 550 38. M. DuPage, A. L. Dooley, T. Jacks, Conditional mouse lung cancer models using  
551 adenoviral or lentiviral delivery of Cre recombinase. *Nat. Protocols* **4**, 1064-1072 (2009).
- 552 39. T. Papagiannakopoulos, M. R. Bauer, S. M. Davidson, M. Heimann, L. Subbaraj, A.  
553 Bhutkar, J. Bartlebaugh, M. G. Vander Heiden, T. Jacks, Circadian Rhythm Disruption  
554 Promotes Lung Tumorigenesis. *Cell metabolism*, (2016).
- 555 40. L. Soucek, J. R. Whitfield, N. M. Sodikin, D. Massó-Vallés, E. Serrano, A. N. Karnezis, L.  
556 B. Swigart, G. I. Evan, Inhibition of Myc family proteins eradicates KRas-driven lung  
557 cancer in mice. *Genes Dev* **27**, 504-513 (2013).

- 558 41. M. I. Love, W. Huber, S. Anders, Moderated estimation of fold change and dispersion for  
559 RNA-seq data with DESeq2. *Genome Biol* **15**, 550-550 (2014).
- 560 42. Brian J. Altman, Annie L. Hsieh, A. Sengupta, Saikumari Y. Krishnanaiah, Zachary E.  
561 Stine, Zandra E. Walton, Arvin M. Gouw, A. Venkataraman, B. Li, P. Goraksha-Hicks,  
562 Sharon J. Diskin, David I. Bellovin, M. C. Simon, Jeffrey C. Rathmell, Mitchell A. Lazar,  
563 John M. Maris, Dean W. Felsher, John B. Hogenesch, Aalim M. Weljie, Chi V. Dang,  
564 MYC Disrupts the Circadian Clock and Metabolism in Cancer Cells. *Cell Metabolism* **22**,  
565 1009-1019 (2015).
- 566 43. A. Relógio, P. Thomas, P. Medina-Pérez, S. Reischl, S. Bervoets, E. Gloc, P. Riemer, S.  
567 Mang-Fatehi, B. Maier, R. Schäfer, U. Leser, H. Herzog, A. Kramer, C. Sers, Ras-  
568 mediated deregulation of the circadian clock in cancer. *PLoS Genet* **10**, e1004338-  
569 e1004338 (2014).
- 570 44. J. Shilts, G. Chen, J. J. Hughey, Evidence for widespread dysregulation of circadian clock  
571 progression in human cancer. *PeerJ* **6**, e4327-e4327 (2018).
- 572 45. R. Zhang, N. F. Lahens, H. I. Ballance, M. E. Hughes, J. B. Hogenesch, A circadian gene  
573 expression atlas in mammals: Implications for biology and medicine. *Proceedings of the*  
574 *National Academy of Sciences* **111**, 16219 (2014).
- 575 46. I. Shamovsky, E. Nudler, New insights into the mechanism of heat shock response  
576 activation. *Cellular and molecular life sciences : CMLS* **65**, 855-861 (2008).
- 577 47. M. Akerfelt, R. I. Morimoto, L. Sistonen, Heat shock factors: integrators of cell stress,  
578 development and lifespan. *Nat Rev Mol Cell Biol* **11**, 545-555 (2010).
- 579 48. S. Lindquist, The Heat-Shock Response. *Annual review of biochemistry* **55**, 1151-1191  
580 (1986).
- 581 49. D. Kovács, T. Sigmond, B. Hotzi, B. Bohár, D. Fazekas, V. Deák, T. Vellai, J. Barna,  
582 HSF1Base: A Comprehensive Database of HSF1 (Heat Shock Factor 1) Target Genes. *Int*  
583 *J Mol Sci* **20**, 5815 (2019).
- 584 50. J. M. D. Grandjean, L. Plate, R. I. Morimoto, M. J. Bollong, E. T. Powers, R. L. Wiseman,  
585 Deconvoluting Stress-Responsive Proteostasis Signaling Pathways for Pharmacologic  
586 Activation Using Targeted RNA Sequencing. *ACS chemical biology* **14**, 784-795 (2019).
- 587 51. M. L. Mendillo, S. Santagata, M. Koeva, G. W. Bell, R. Hu, R. M. Tamimi, E. Fraenkel,  
588 T. A. Ince, L. Whitesell, S. Lindquist, HSF1 drives a transcriptional program distinct from  
589 heat shock to support highly malignant human cancers. *Cell* **150**, 549-562 (2012).
- 590 52. C. Behl, Breaking BAG: The Co-Chaperone BAG3 in Health and Disease. *Trends in*  
591 *pharmacological sciences* **37**, 672-688 (2016).
- 592 53. C. Ambrogio, G. Gómez-López, M. Falcone, A. Vidal, E. Nadal, N. Crosetto, R. B.  
593 Blasco, P. J. Fernández-Marcos, M. Sánchez-Céspedes, X. Ren, Z. Wang, K. Ding, M.  
594 Hidalgo, M. Serrano, A. Villanueva, D. Santamaría, M. Barbacid, Combined inhibition of  
595 DDR1 and Notch signaling is a therapeutic strategy for KRAS-driven lung  
596 adenocarcinoma. *Nature Medicine* **22**, 270-277 (2016).
- 597 54. H. Reinke, C. Saini, F. Fleury-Olela, C. Dibner, I. J. Benjamin, U. Schibler, Differential  
598 display of DNA-binding proteins reveals heat-shock factor 1 as a circadian transcription  
599 factor. *Genes Dev* **22**, 331-345 (2008).
- 700 55. D. Tsukamoto, T. Hasegawa, S.-i. Hirose, Y. Sakurai, M. Ito, N. Takamatsu, Circadian  
701 transcription factor HSF1 regulates differential HSP70 gene transcription during the  
702 arousal-torpor cycle in mammalian hibernation. *Scientific Reports* **9**, 832 (2019).
- 703 56. B. Dong, A. M. Jaeger, P. F. Hughes, D. R. Loiselle, J. S. Hauck, Y. Fu, T. A. Haystead, J.  
704 Huang, D. J. Thiele, Targeting therapy-resistant prostate cancer via a direct inhibitor of the  
705 human heat shock transcription factor 1. *Science Translational Medicine* **12**, eabb5647  
706 (2020).

- 707 57. B. Calamini, M. C. Silva, F. Madoux, D. M. Hutt, S. Khanna, M. A. Chalfant, S. A.  
708 Saldanha, P. Hodder, B. D. Tait, D. Garza, W. E. Balch, R. I. Morimoto, Small-molecule  
709 proteostasis regulators for protein conformational diseases. *Nat Chem Biol* **8**, 185-196  
710 (2011).
- 711 58. E. L. Jackson, K. P. Olive, D. A. Tuveson, R. Bronson, D. Crowley, M. Brown, T. Jacks,  
712 The Differential Effects of Mutant p53 Alleles on Advanced Murine Lung Cancer. *Cancer*  
713 *Research* **65**, 10280-10288 (2005).
- 714 59. E. Hadadi, W. Taylor, X.-M. Li, Y. Aslan, M. Villote, J. Rivière, G. Duvallet, C. Auriau,  
715 S. Dulong, I. Raymond-Letron, S. Provot, A. Bennaceur-Griscelli, H. Acloque, Chronic  
716 circadian disruption modulates breast cancer stemness and immune microenvironment to  
717 drive metastasis in mice. *Nature Communications* **11**, 3193 (2020).
- 718 60. E. Filipski, P. F. Innominato, M. Wu, X.-M. Li, S. Iacobelli, L.-J. Xian, F. Lévi, Effects of  
719 Light and Food Schedules on Liver and Tumor Molecular Clocks in Mice. *JNCI: Journal*  
720 *of the National Cancer Institute* **97**, 507-517 (2005).
- 721 61. B. Kornmann, O. Schaad, H. Bujard, J. S. Takahashi, U. Schibler, System-Driven and  
722 Oscillator-Dependent Circadian Transcription in Mice with a Conditionally Active Liver  
723 Clock. *PLOS Biology* **5**, e34 (2007).
- 724 62. Y. Lee, N. F. Lahens, S. Zhang, J. Bedont, J. M. Field, A. Sehgal, G1/S cell cycle  
725 regulators mediate effects of circadian dysregulation on tumor growth and provide targets  
726 for timed anticancer treatment. *PLoS biology* **17**, e3000228-e3000228 (2019).
- 727 63. Rishi V. Puram, Monika S. Kowalczyk, Carl G. de Boer, Rebekka K. Schneider, Peter G.  
728 Miller, M. McConkey, Z. Tothova, H. Tejero, D. Heckl, M. Järås, Michelle C. Chen, H.  
729 Li, A. Tamayo, Glenn S. Cowley, O. Rozenblatt-Rosen, F. Al-Shahrour, A. Regev,  
730 Benjamin L. Ebert, Core Circadian Clock Genes Regulate Leukemia Stem Cells in AML.  
731 *Cell* **165**, 303-316 (2016).
- 732 64. Z. Dong, G. Zhang, M. Qu, R. C. Gimple, Q. Wu, Z. Qiu, B. C. Prager, X. Wang, L. J. Y.  
733 Kim, A. R. Morton, D. Dixit, W. Zhou, H. Huang, B. Li, Z. Zhu, S. Bao, S. C. Mack, L.  
734 Chavez, S. A. Kay, J. N. Rich, Targeting Glioblastoma Stem Cells through Disruption of  
735 the Circadian Clock. *Cancer Discovery* **9**, 1556 (2019).
- 736 65. R. L. Carpenter, Y. Gökmen-Polar, HSF1 as a Cancer Biomarker and Therapeutic Target.  
737 *Curr Cancer Drug Targets* **19**, 515-524 (2019).
- 738 66. N. Kourtis, R. S. Moubarak, B. Aranda-Orgilles, K. Lui, I. T. Aydin, T. Trimarchi, F.  
739 Darvishian, C. Salvaggio, J. Zhong, K. Bhatt, Emily I. Chen, J. T. Celebi, C. Lazaris, A.  
740 Tsirigos, I. Osman, E. Hernando, I. Aifantis, FBXW7 modulates cellular stress response  
741 and metastatic potential through HSF1 post-translational modification. *Nature Cell*  
742 *Biology* **17**, 322-332 (2015).
- 743 67. Z. Zhou, Y. Li, Q. Jia, Z. Wang, X. Wang, J. Hu, J. Xiao, Heat shock transcription factor 1  
744 promotes the proliferation, migration and invasion of osteosarcoma cells. *Cell*  
745 *Proliferation* **50**, e12346 (2017).
- 746 68. J. Cui, H. Tian, G. Chen, Upregulation of Nuclear Heat Shock Factor 1 Contributes to  
747 Tumor Angiogenesis and Poor Survival in Patients With Non-Small Cell Lung Cancer.  
748 *The Annals of Thoracic Surgery* **100**, 465-472 (2015).
- 749 69. R. Scherz-Shouval, S. Santagata, M. L. Mendillo, L. M. Sholl, I. Ben-Aharon, A. H. Beck,  
750 D. Dias-Santagata, M. Koeva, S. M. Stemmer, L. Whitesell, S. Lindquist, The  
751 reprogramming of tumor stroma by HSF1 is a potent enabler of malignancy. *Cell* **158**,  
752 564-578 (2014).
- 753 70. C. Xi, Y. Hu, P. Buckhaults, D. Moskophidis, N. F. Mivechi, Heat shock factor Hsf1  
754 cooperates with ErbB2 (Her2/Neu) protein to promote mammary tumorigenesis and  
755 metastasis. *J Biol Chem* **287**, 35646-35657 (2012).



- 756 71. J. N. Min, L. Huang, D. B. Zimonjic, D. Moskophidis, N. F. Mivechi, Selective  
757 suppression of lymphomas by functional loss of Hsf1 in a p53-deficient mouse model for  
758 spontaneous tumors. *Oncogene* **26**, 5086-5097 (2007).
- 759 72. V. L. Gabai, L. Meng, G. Kim, T. A. Mills, I. J. Benjamin, M. Y. Sherman, Heat shock  
760 transcription factor Hsf1 is involved in tumor progression via regulation of hypoxia-  
761 inducible factor 1 and RNA-binding protein HuR. *Mol Cell Biol* **32**, 929-940 (2012).
- 762 73. A. Toma-Jonik, W. Widlak, J. Korfanty, T. Cichon, R. Smolarczyk, A. Gogler-Piglowska,  
763 P. Widlak, N. Vydra, Active heat shock transcription factor 1 supports migration of the  
764 melanoma cells via vinculin down-regulation. *Cellular Signalling* **27**, 394-401 (2015).
- 765 74. S. Chatterjee, T. F. Burns, Targeting Heat Shock Proteins in Cancer: A Promising  
766 Therapeutic Approach. *Int J Mol Sci* **18**, 1978 (2017).
- 767 75. B. J. Lang, M. E. Guerrero-Giménez, T. L. Prince, A. Ackerman, C. Bonorino, S. K.  
768 Calderwood, Heat Shock Proteins Are Essential Components in Transformation and  
769 Tumor Progression: Cancer Cell Intrinsic Pathways and Beyond. *Int J Mol Sci* **20**, 4507  
770 (2019).
- 771 76. S. Mittal, M. S. Rajala, Heat shock proteins as biomarkers of lung cancer. *Cancer Biology*  
772 *& Therapy* **21**, 477-485 (2020).
- 773 77. S. Chatterjee, S. Bhattacharya, M. A. Socinski, T. F. Burns, HSP90 inhibitors in lung  
774 cancer: promise still unfulfilled. *Clinical advances in hematology & oncology : H&O* **14**,  
775 346-356 (2016).
- 776 78. C. Dai, S. Santagata, Z. Tang, J. Shi, J. Cao, H. Kwon, R. T. Bronson, L. Whitesell, S.  
777 Lindquist, Loss of tumor suppressor NF1 activates HSF1 to promote carcinogenesis. *The*  
778 *Journal of clinical investigation* **122**, 3742-3754 (2012).
- 779 79. M. Bracci, V. Ciarapica, A. Copertaro, M. Barbaresi, N. Manzella, M. Tomasetti, S.  
780 Gaetani, F. Monaco, M. Amati, M. Valentino, V. Rapisarda, L. Santarelli, Peripheral Skin  
781 Temperature and Circadian Biological Clock in Shift Nurses after a Day off. *Int J Mol Sci*  
782 **17**, 623 (2016).
- 783 80. H. E. Molzof, A. Prapanjaroensin, V. H. Patel, M. V. Mokashi, K. L. Gamble, P. A.  
784 Patrician, Misaligned core body temperature rhythms impact cognitive performance of  
785 hospital shift work nurses. *Neurobiol Learn Mem* **160**, 151-159 (2019).
- 786 81. G. Wang, P. Cao, Y. Fan, K. Tan, Emerging roles of HSF1 in cancer: Cellular and  
787 molecular episodes. *Biochimica et Biophysica Acta (BBA) - Reviews on Cancer* **1874**,  
788 188390 (2020).
- 789 82. Y. Lee, S. Y. Fong, J. Shon, S. L. Zhang, R. Brooks, N. F. Lahens, D. Chen, C. V. Dang,  
790 J. M. Field, A. Sehgal, Time-of-day specificity of anticancer drugs may be mediated by  
791 circadian regulation of the cell cycle. *Science Advances* **7**, eabd2645 (2021).
- 792 83. L. J. Eichner, S. N. Brun, S. Herzig, N. P. Young, S. D. Curtis, D. B. Shackelford, M. N.  
793 Shokhirev, M. Leblanc, L. I. Vera, A. Hutchins, D. S. Ross, R. J. Shaw, R. U. Svensson,  
794 Genetic Analysis Reveals AMPK Is Required to Support Tumor Growth in Murine Kras-  
795 Dependent Lung Cancer Models. *Cell Metabolism* **29**, 285-302.e287 (2019).
- 796 84. K. A. Lamia, S. J. Papp, R. T. Yu, G. D. Barish, N. H. Uhlénhaut, J. W. Jonker, M.  
797 Downes, R. M. Evans, Cryptochromes mediate rhythmic repression of the glucocorticoid  
798 receptor. *Nature* **480**, 552-556 (2011).
- 799 85. M. J. L. de Hoon, S. Imoto, J. Nolan, S. Miyano, Open source clustering software.  
800 *Bioinformatics* **20**, 1453-1454 (2004).
- 801 86. A. J. Saldanha, Java Treeview--extensible visualization of microarray data. *Bioinformatics*  
802 **20**, 3246-3248 (2004).
- 803 87. M. E. Hughes, J. B. Hogenesch, K. Kornacker, JTK\_CYCLE: an efficient nonparametric  
804 algorithm for detecting rhythmic components in genome-scale data sets. *J Biol Rhythms*  
805 **25**, 372-380 (2010).

306  
307  
308  
309  
310  
311  
312  
313  
314  
315  
316  
317  
318  
319  
320  
321  
322  
323  
324  
325  
326  
327  
328  
329  
330  
331  
332  
333  
334  
335  
336  
337  
338  
339  
340  
341  
342  
343  
344  
345  
346  
347  
348  
349  
350  
351  
352  
353  
354  
355

## Acknowledgments

We thank Drs. Lillian Eichner and Robert Svensson for helpful discussions and gifting us critical reagents and expertise. We thank Dr. Roderick Bronson for histopathological analysis of tumors, Nicole Madrazo for performing HSF1 luciferase assay, Toni Thomas, Judy Valecko, and Yolanda Slivers for administrative assistance, and Xia Jing for technical assistance.

### Funding:

National Institutes of Health grant CA211187 (KAL)  
Brown Foundation for Cancer Research (KAL)  
National Institutes of Health grant DK107604 (RLW)  
National Institutes of Health grant R00CA204593 (BJA)  
National Science Foundation/DBI-1759544 (EI)

### Author contributions:

Conceptualization: MP, KAL  
Methodology: MP, KAL, RJS, RLW, BJA  
Investigation: MP, EI, RM, ABC, LHI  
Visualization: MP, KAL, LHI, BJA  
Supervision: KAL, RLW, RJS, MJB  
Writing—original draft: MP, KAL  
Writing—review & editing: MP, KAL, RJS, RLW, MJB, BJA

### Competing interests:

Authors declare that they have no competing interests.

### Data and materials availability:

RNA sequencing data are deposited in Gene Expression Omnibus (GEO) with accession number GSE194097.

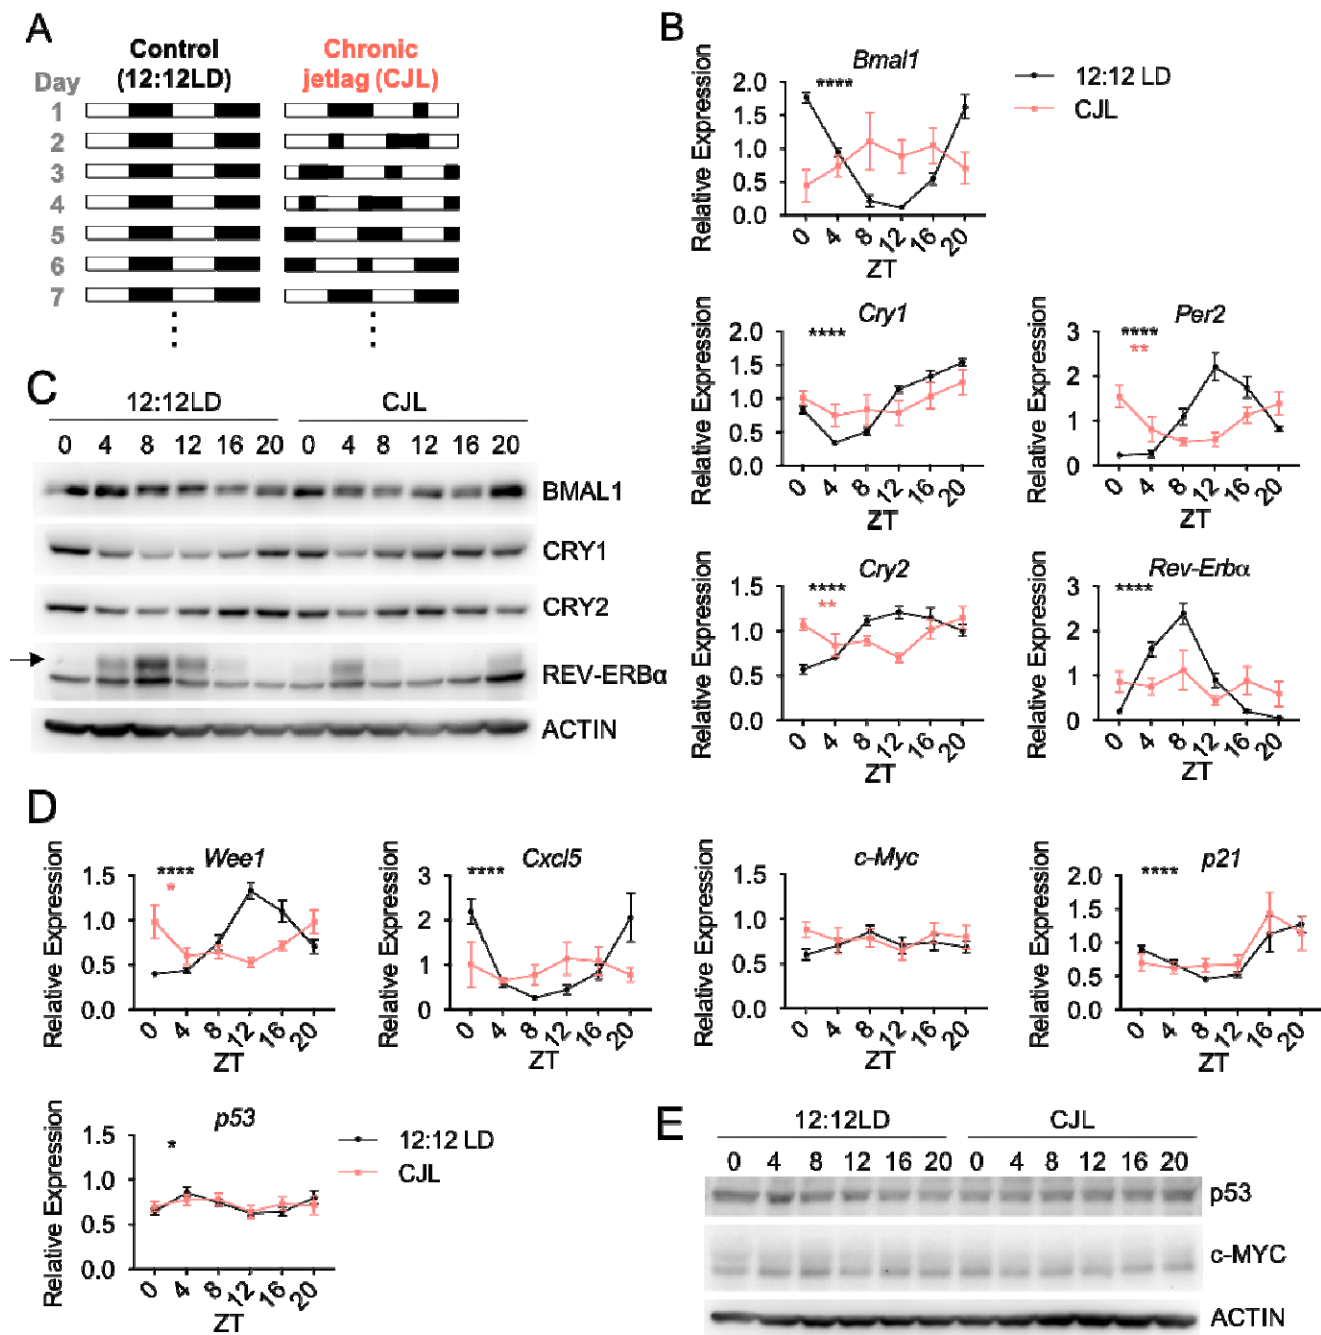

**Fig. 1. Chronic jetlag (CJL) severely impairs rhythmicity and magnitude of core clock and clock-controlled genes in the lung.** (A) Schematic representation of the CJL protocol. White and black rectangles represent periods of light and dark, respectively. Each row represents two consecutive days starting with the numbered day shown at left. (B-E) C57BL/6J male and female mice were housed in 12:12LD or CJL for 8 weeks. Lung tissues were collected at the indicated times (ZT0: light on, ZT12: light off) on Day 1 of the schedule shown in (A). (B,D) Gene expression normalized to *U36b4* measured by quantitative real-time PCR. Data represent mean  $\pm$  SEM for 3 males and 3 females per time point and light condition. Rhythmicity was determined by JTK\_Cycle analyses; \* $P^{\text{JTKCycle}} < 0.05$ , \*\* $P^{\text{JTKCycle}} < 0.01$ , \*\*\*\* $P^{\text{JTKCycle}} < 0.0001$ . (C,E) Proteins detected by immunoblot. Each lane on the Western blot represents a sample prepared from a unique animal. Representative images were taken from  $n = 6$  biological replicates.

356

357

358

359

360

361

362

363

364

365

366

367

368

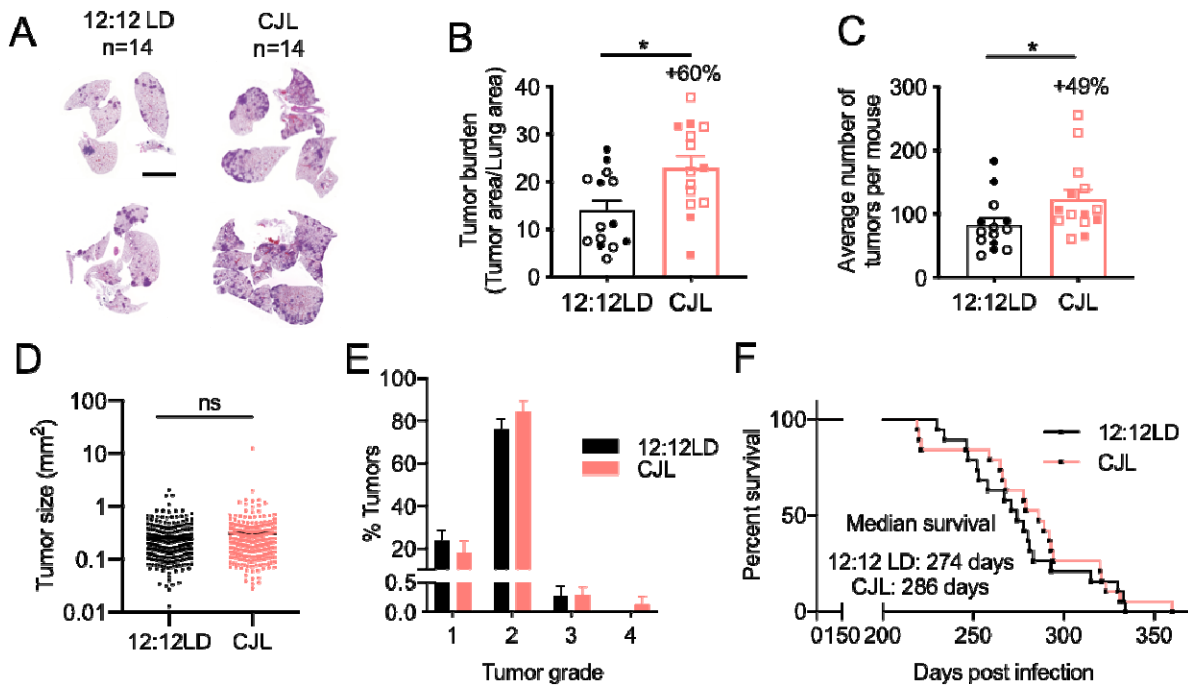

369  
370  
371 **Fig. 2. Chronic jetlag (CJL) causes an increase in tumor burden in K mice but has no**  
372 **impact on survival.** Five weeks post-infection with lentivirus-Cre, K mice were placed  
373 either 12:12LD or CJL for 20 weeks (A-E) or until signs of distress (F). (A)  
374 Representative H&E-stained sections at endpoint; scale bar, 5000  $\mu$ m. Tumor burden (B),  
375 numbers (C), size (D) and grade (E) were assessed from H&E sections. Column data  
376 represent mean  $\pm$  SEM. Values for individual animals (B,C,E) or tumors (D) are plotted.  
377 (B,C) Clear and filled symbols represent males and females respectively. \*P <0.05 by  
378 Mann-Whitney test. (F) Kaplan-Meier survival analysis for K mice placed in 12:12LD (n  
379 = 19) or CJL (n = 19) conditions.

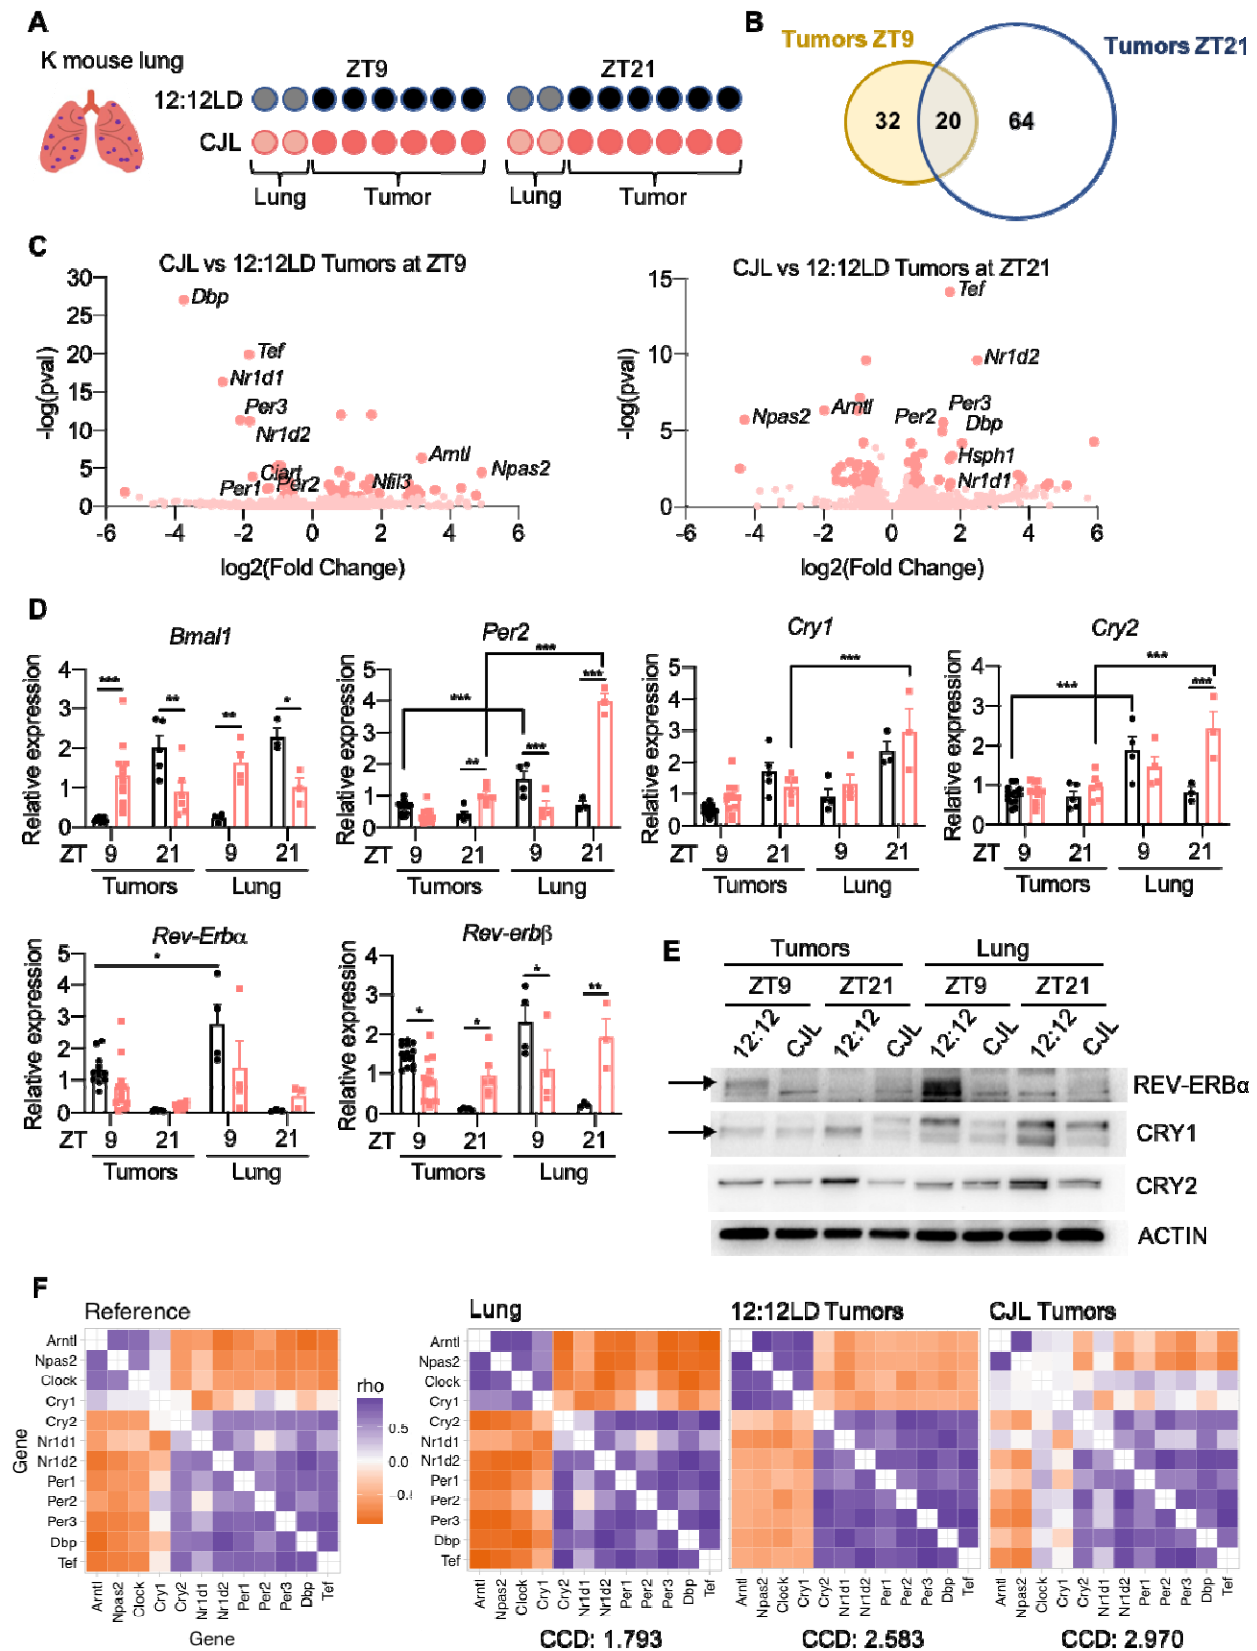

**Fig. 3. Chronic jetlag (CjL) further disrupts an already dysregulated clockwork in tumors from K mice.** Five weeks post-infection with lentivirus-Cre, K mice were placed in either 12:12LD or CjL for 20 weeks. (A) For RNA-sequencing, 3 tumors per animal and two mice per time point and light conditions were used. (B) Plots indicating the numbers of differentially expressed genes between 12:12LD and CjL by DESeq2 analyses

380  
381  
382  
383  
384  
385

386 for each condition, with adj. p-value<0.05 and fold change >+/- 1.4 cut-offs. (C) Volcano  
387 plots of differentially expressed genes between 12:12LD and CJL by DESeq2 analyses for  
388 tumors collected at ZT9 and ZT21. (D) Gene expression normalized to *U36b4* measured  
389 by quantitative real-time PCR. Data represent mean  $\pm$  SEM; n = 14 and 12 for tumors  
390 collected at ZT9 in 12:12LD and CJL respectively, n= 5 and 6 for tumors collected at  
391 ZT21 in 12:12LD and CJL respectively and n=3-4 for lung samples. \*P <0.05, \*\*P <0.01  
392 and \*\*\*P <0.001 by two-Way ANOVA, post hoc Bonferroni test. (E) Proteins detected by  
393 immunoblot. Tumors and lungs for each light condition and time point on the blot were  
394 from the same animal. Representative images were taken from n = 3 biological replicates.  
395 (F) Heatmaps of Spearman correlation between each pair of the 12 clock genes and  
396 corresponding clock correlation distance (CCD; relative to the mouse reference) in murine  
397 healthy lung from previously published data set GSE54651, or in tumors from 12:12LD or  
398 CJL conditions.

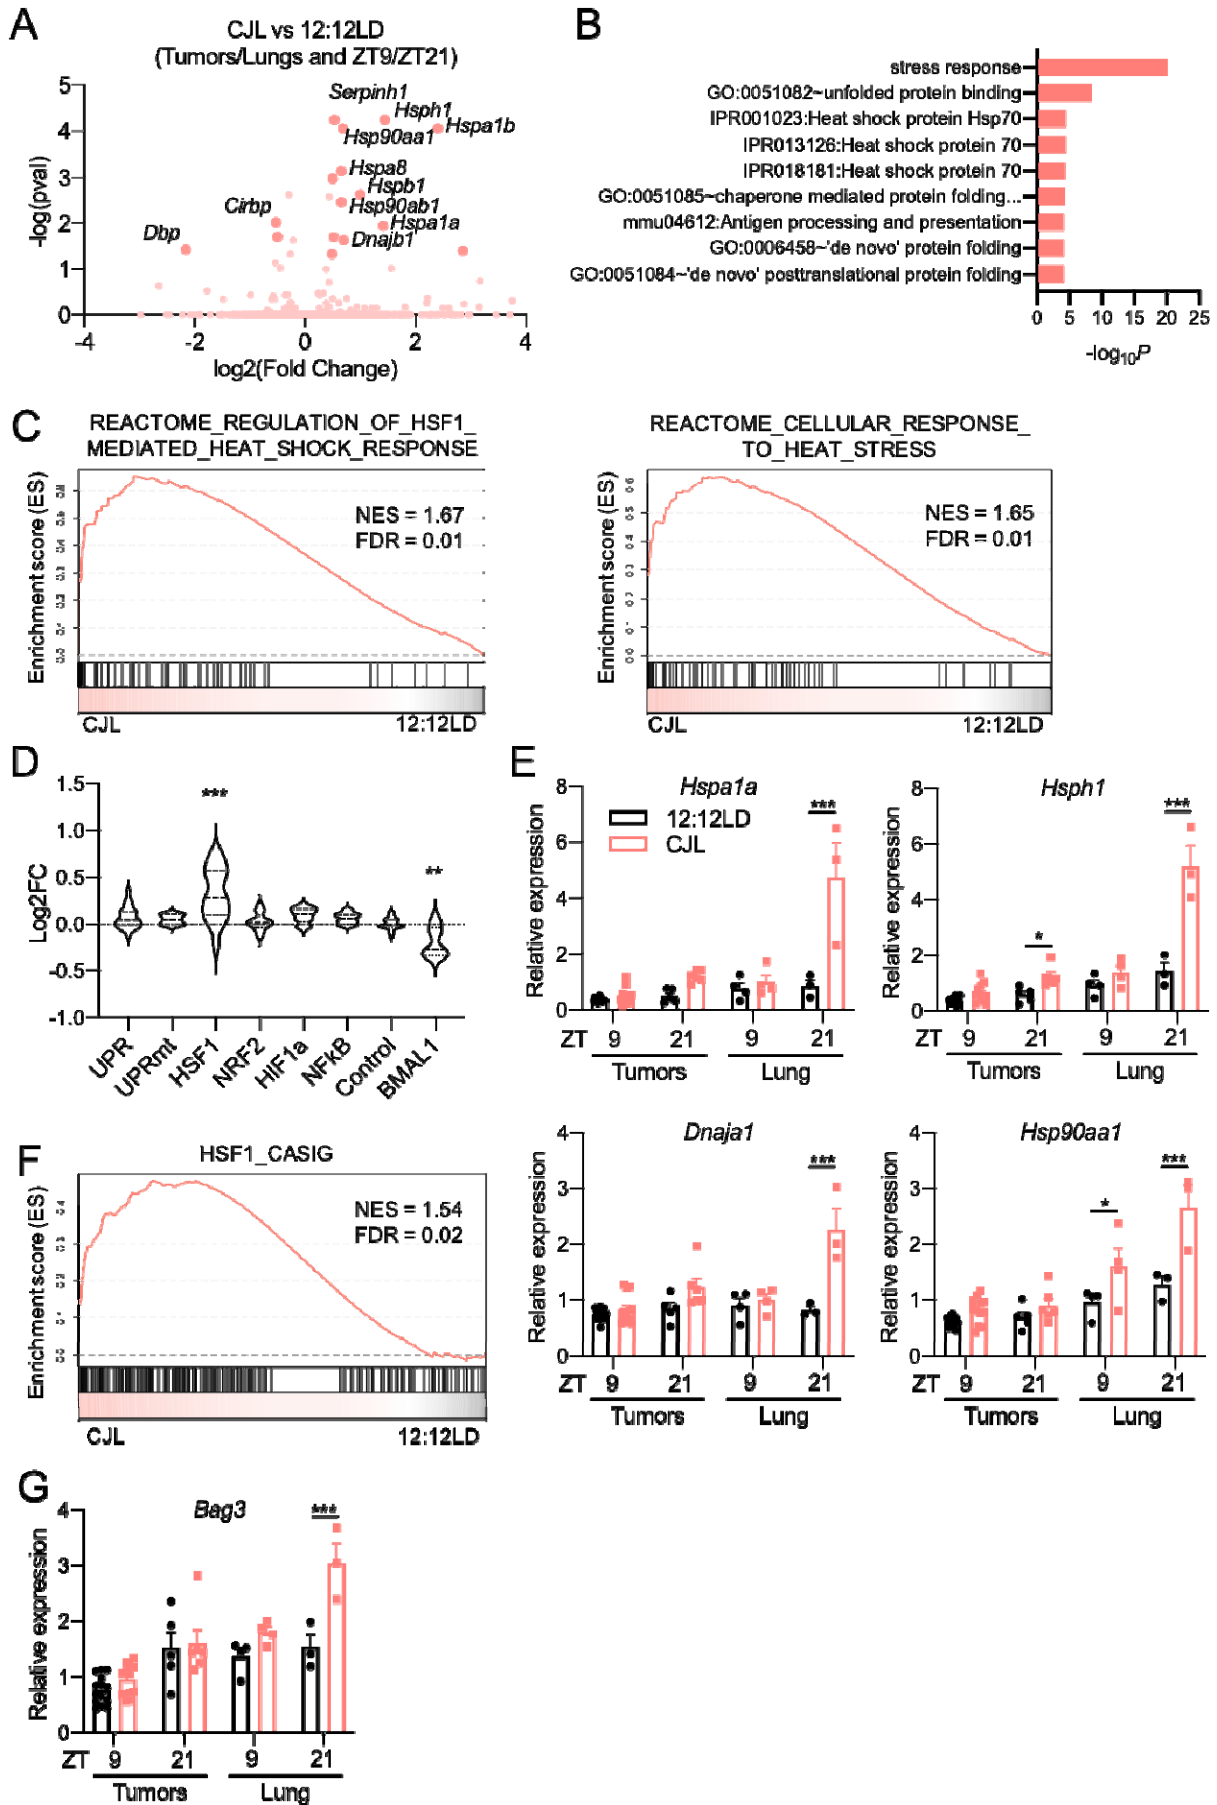

**Fig. 4 CJL enhances expression of the HSF1-mediated heat shock response and cancer signature in *Kras*<sup>G12D</sup>-driven lung tumor model.** Five weeks post-infection with lentivirus-Cre, K mice were placed in either 12:12LD or CJL for 20 weeks. **(A)** Volcano plots of differentially expressed genes between 12:12LD and CJL by DESeq2 analyses for all samples (tumors+lungs), taking time of collection (ZT9/21) as confounding factor. **(B)** DAVID analyses on the differentially expressed genes by DESeq2 in all samples between 12:12LD and CJL, taking time of collection as confounding factor. Only terms with FDR < 0.25 are shown. **(C)** GSEA plots for the cellular response to heat stress and HSF1-mediated heat shock response reactome gene sets applied to samples (lungs+ tumors) from CJL vs 12:12LD housed K mice. **(D)** Activation of stress response pathways by CJL in lungs and tumors, independently of collection time, revealed by grouped fold change for transcripts established as selective targets of each stress pathways (Grandjean et al., 2019) or “BMAL1-pathway” (Shilts et al., 2018). \*\*P < 0.01, \*\*\*\* P < 0.0001 by one-Way ANOVA with Dunnett’s multiple comparison test. **(E,G)** Gene expression normalized to *U36b4* measured by quantitative real-time PCR; T = tumors, L = lungs. Data represent mean ± SEM; n = 14 and 12 for tumors collected at ZT9 in 12:12LD and CJL respectively, n= 5 and 6 for tumors collected at ZT21 in 12:12LD and CJL respectively and n=3-4 for lung samples. \*P < 0.05, \*\*P < 0.01 and \*\*\*P < 0.001 by two-Way ANOVA, post hoc Bonferroni test. **(F)** GSEA plot for the gene set representing the HSF1-Cancer signature network applied to samples (lungs+ tumors) from CJL vs 12:12LD housed K mice.

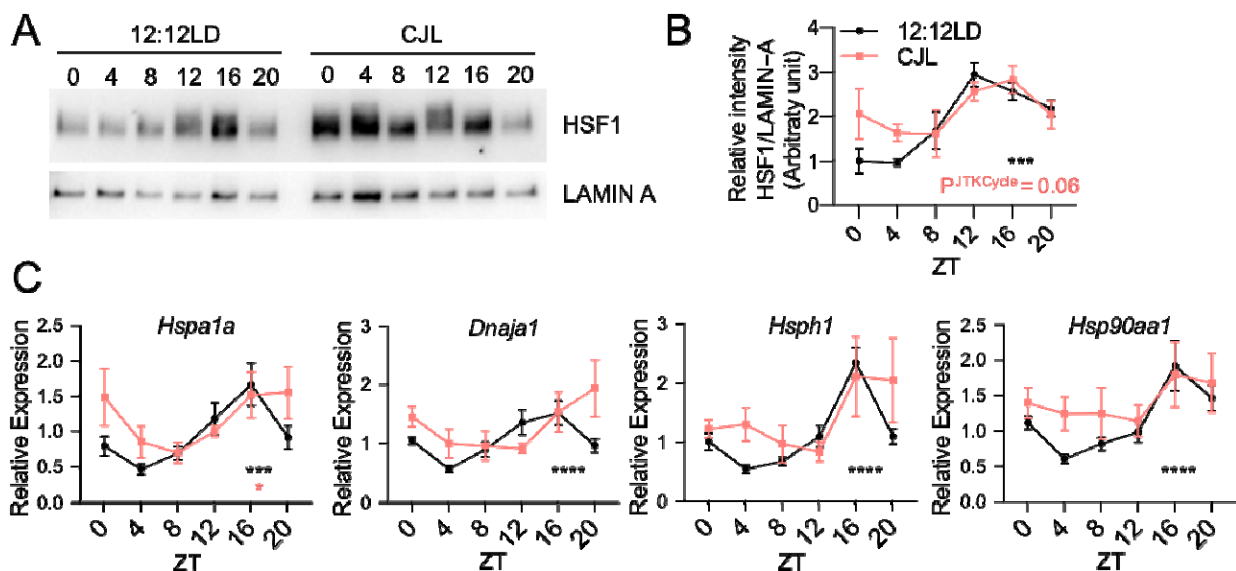

**Fig. 5 Time-regulated HSF1 nuclear accumulation and transcriptional activity are perturbed upon CJL exposure.** C57BL/6J mice were housed in 12:12LD or CJL for 8-12 weeks. Lung tissues were collected at the indicated times (hours after lights on) on Day 1 of the schedule shown in Fig. 1A. **(A)** Proteins from lung nuclear extracts detected by immunoblot. Each lane on the Western blot represents a sample prepared from a unique animal. Representative images were taken from n = 3 biological replicates. **(B)** Quantitation of (A). Rhythmicity was determined by JTK\_Cycle analyses; \*\*\*P<sup>JTKCycle</sup> < 0.001. **(C)** Gene expression normalized to *U36b4* measured by quantitative real-time PCR. Data represent mean ± SEM for 3 males and 3 females per time point and light condition. Rhythmicity was determined by JTK\_Cycle analyses; \*P<sup>JTKCycle</sup> < 0.05, \*\*\*P<sup>JTKCycle</sup> < 0.001, \*\*\*\*P<sup>JTKCycle</sup> < 0.0001.



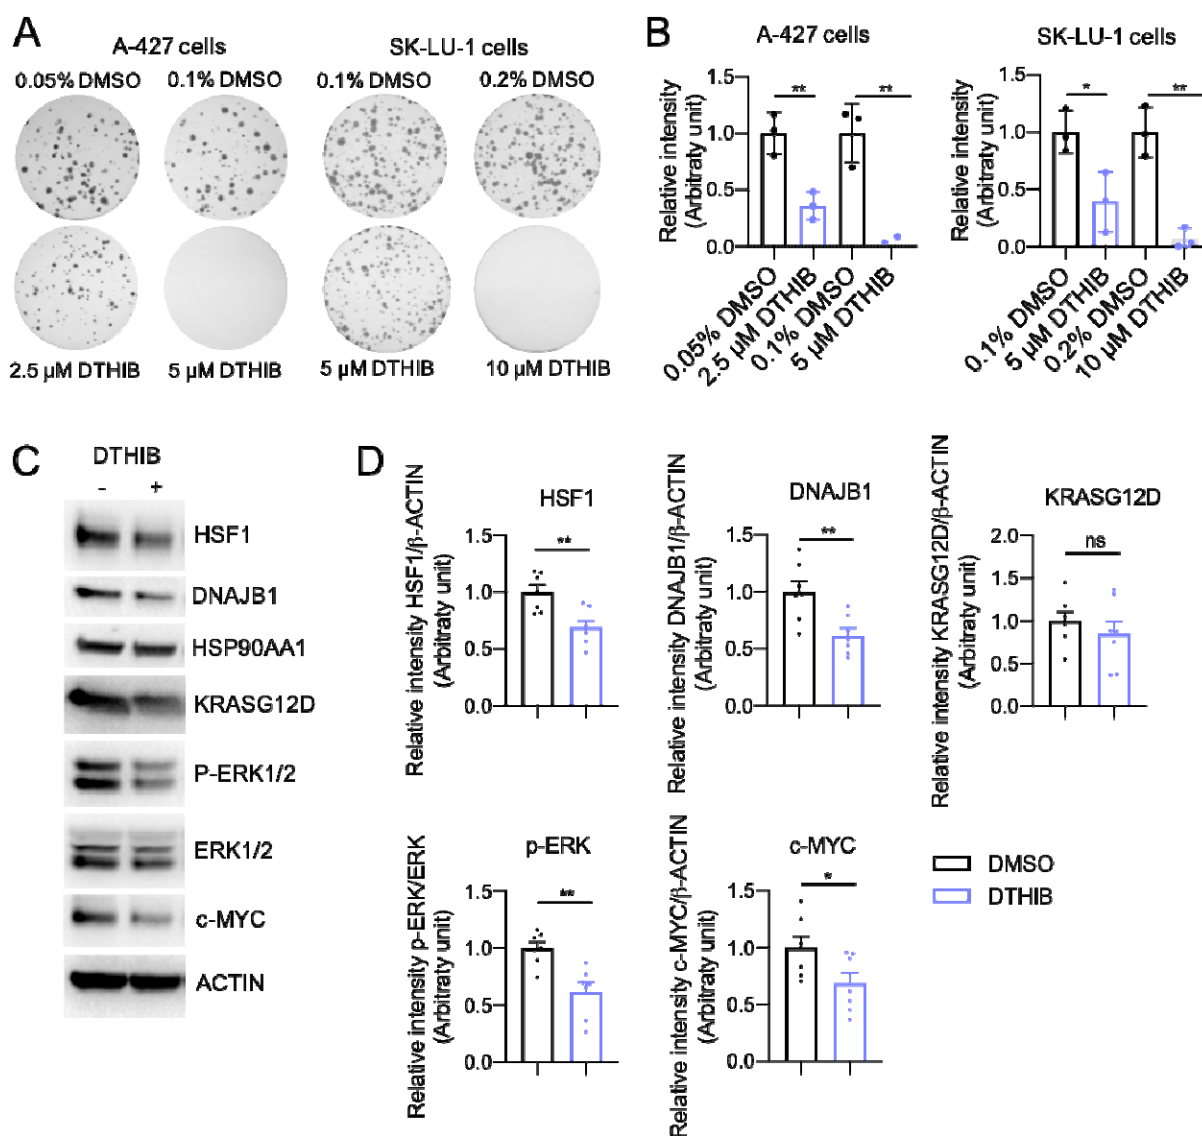

**Fig. 6 HSF1 signaling influences human KRAS-mutant LUAD cell growth.** (A) Representative images of crystal violet stained colonies formed by A-427 or SK-LU-1 cells treated with DTHIB or vehicle DMSO 2 days after seeding, for 14 days. (B) Quantification of (A) from three biological replicates. Each condition was compared to controls that were plated in wells on the same plates. Bars represent mean  $\pm$  SD, \*\* $P < 0.01$  by student t-test. (C) Immunoblot of A-427 cells treated with 5  $\mu$ M DTHIB or 0.1% DMSO for 48h. Representative of  $n=7$ . (D) Quantitation of (C).

934  
935  
936  
937  
938  
939  
940  
941
